# Supplementary material for: Structure–Function Relationship within Cu-Peptoid Electrocatalysts for Water Oxidation
Source: MDPI journal article supplement (doi:10.3390/inorganics11070312), 2023-07-24
Supplement: s1 [file s1]

Supporting Information for:

**Structure-Function Relationship within Cu-peptoid  
Electrocatalysts for Water Oxidation**

Guilin Ruan<sup>1</sup>, Natalia Fridman<sup>1</sup> and Galia Maayan<sup>1\*</sup>

<sup>1</sup> Schulich Faculty of Chemistry, Technion – Israel Institute of Technology, Technion City,  
Haifa 3200008, Israel.

\* Correspondence: gm92@technion.ac.il.

## Supporting Figures:

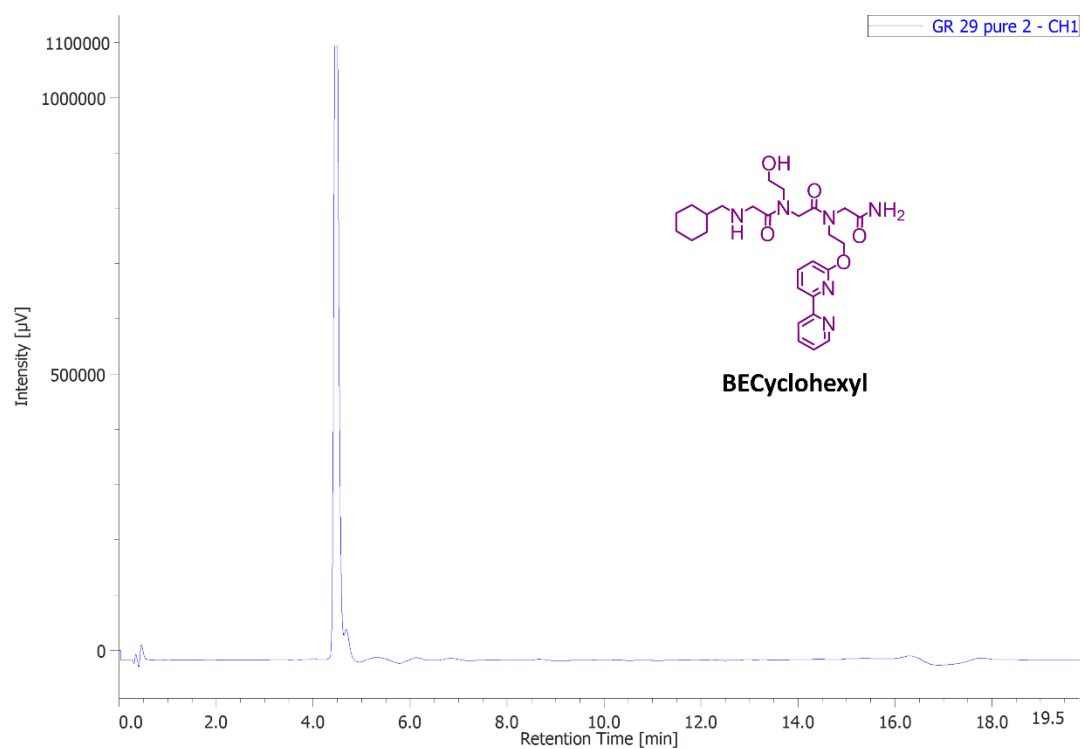

Figure S1. Analytical HPLC of preparative peptoid **BECyclohexyl**.

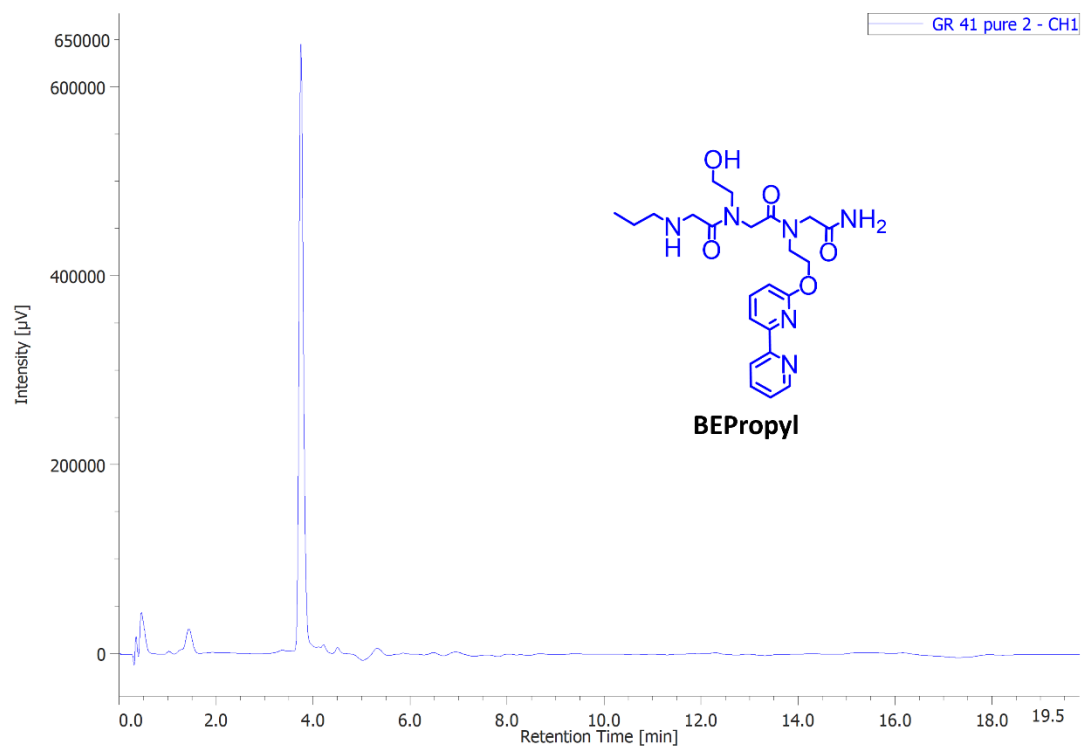

Figure S2. Analytical HPLC of preparative peptoid **BEPropyl**.

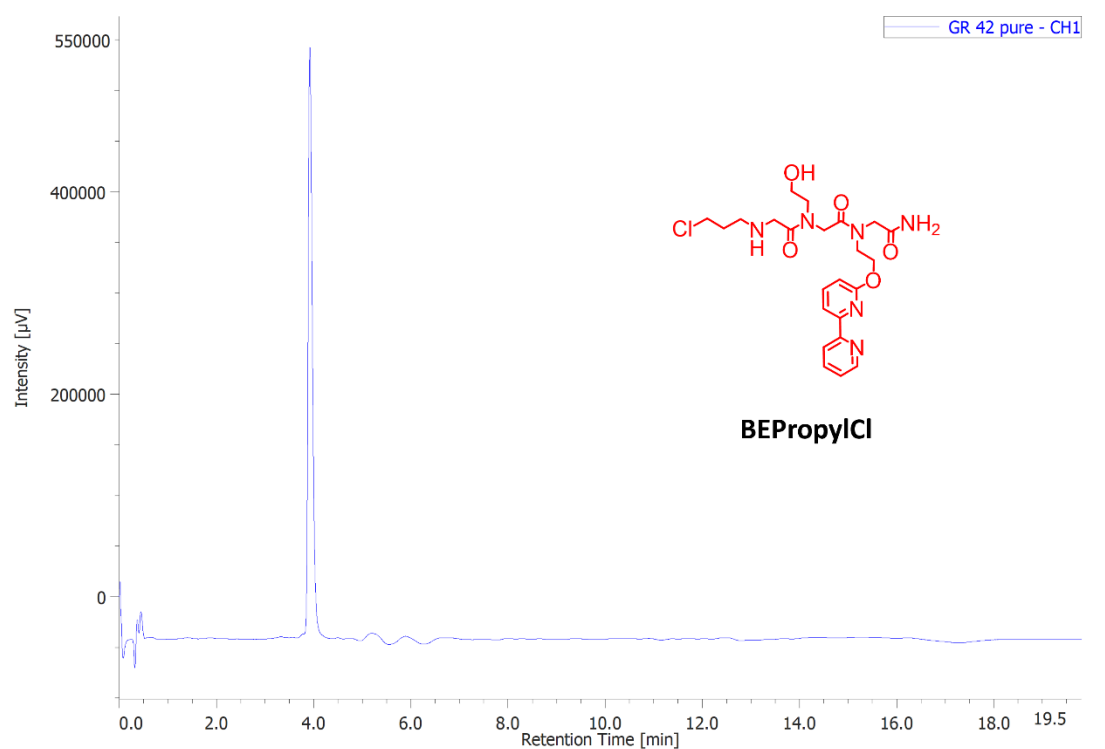

Figure S3. Analytical HPLC of preparative peptoid **BEPropylCl**.

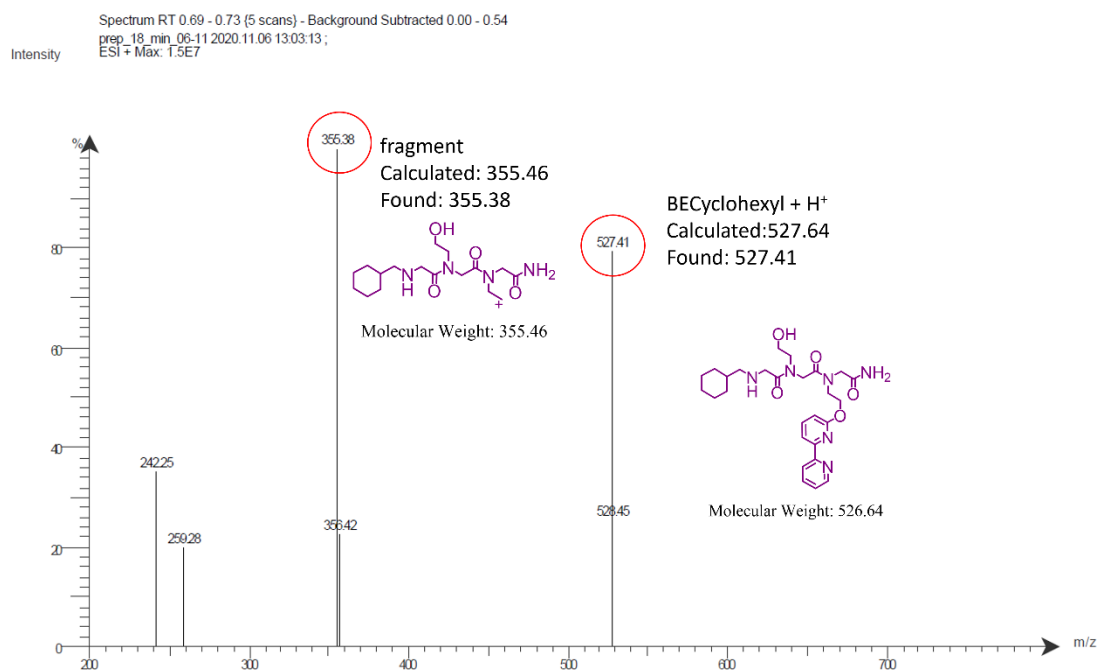

Figure S4. ESI-MS of preparative peptoid **BEPropylCl**.

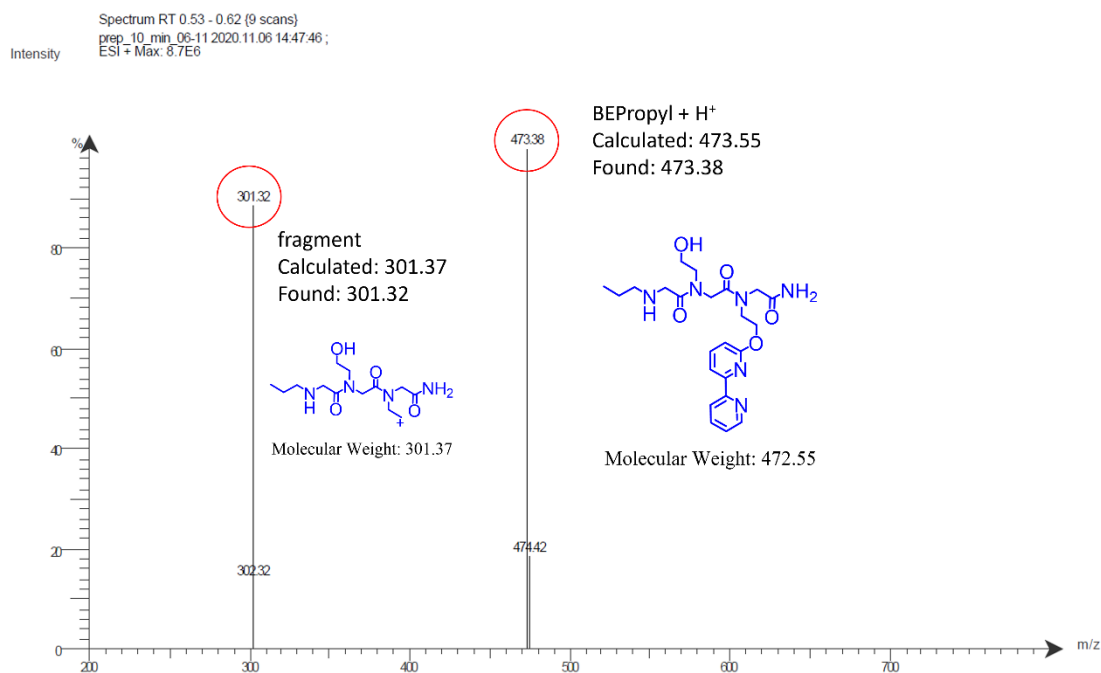

Figure S5. ESI-MS of preparative peptoid **BEPropyl**.

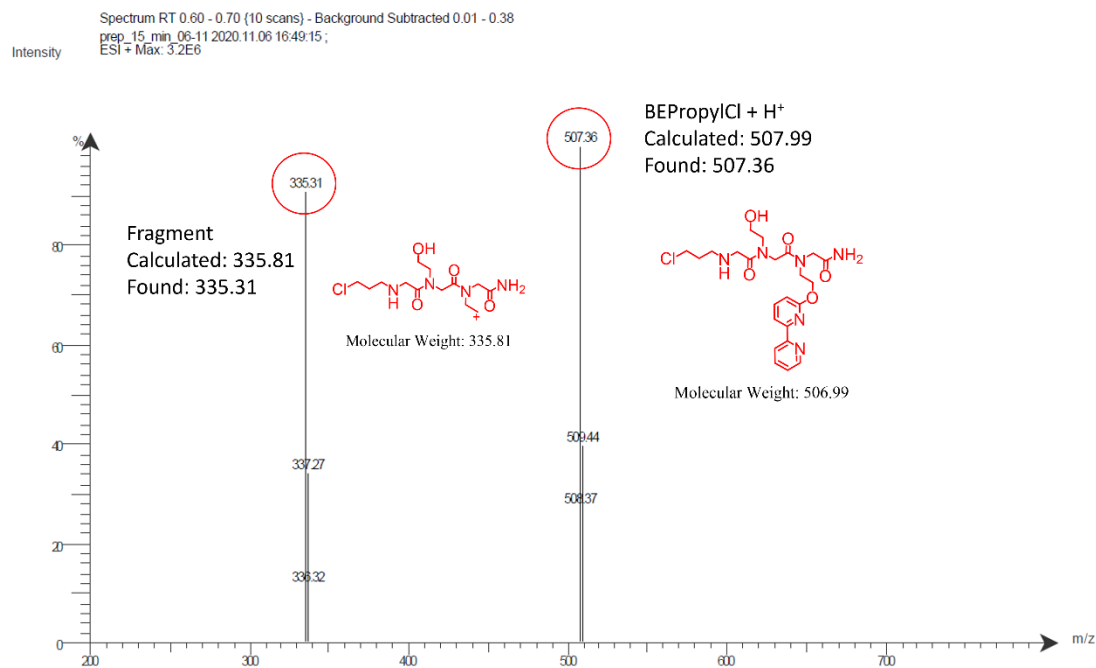

Figure S6. ESI-MS of preparative peptoid **BEPropylCl**.

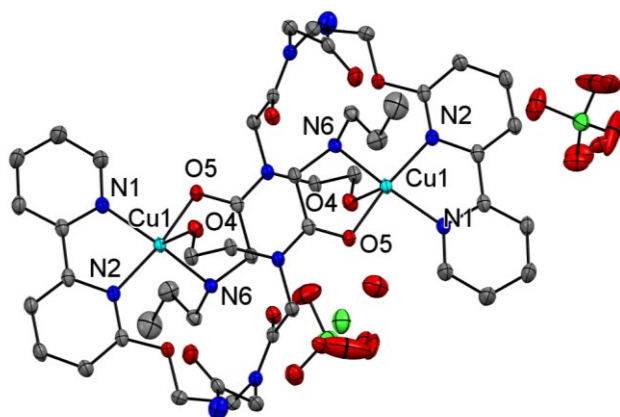

Figure S7. Crystal structure of complex  $\text{Cu}_2(\text{BEPropyl})_2$ , hydrogen atoms are omitted for clarity.

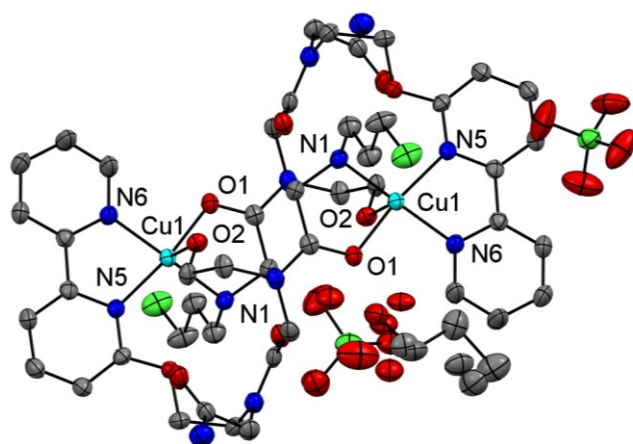

Figure S8. Crystal structure of complex  $\text{Cu}_2(\text{BEPropylCl})_2$ , hydrogen atoms are omitted for clarity.

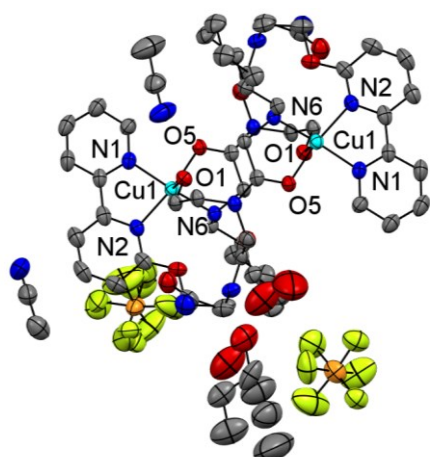

Figure S9. Crystal structure of complex  $\text{Cu}_2(\text{BECyclohexyl})_2$ , hydrogen atoms are omitted for clarity.

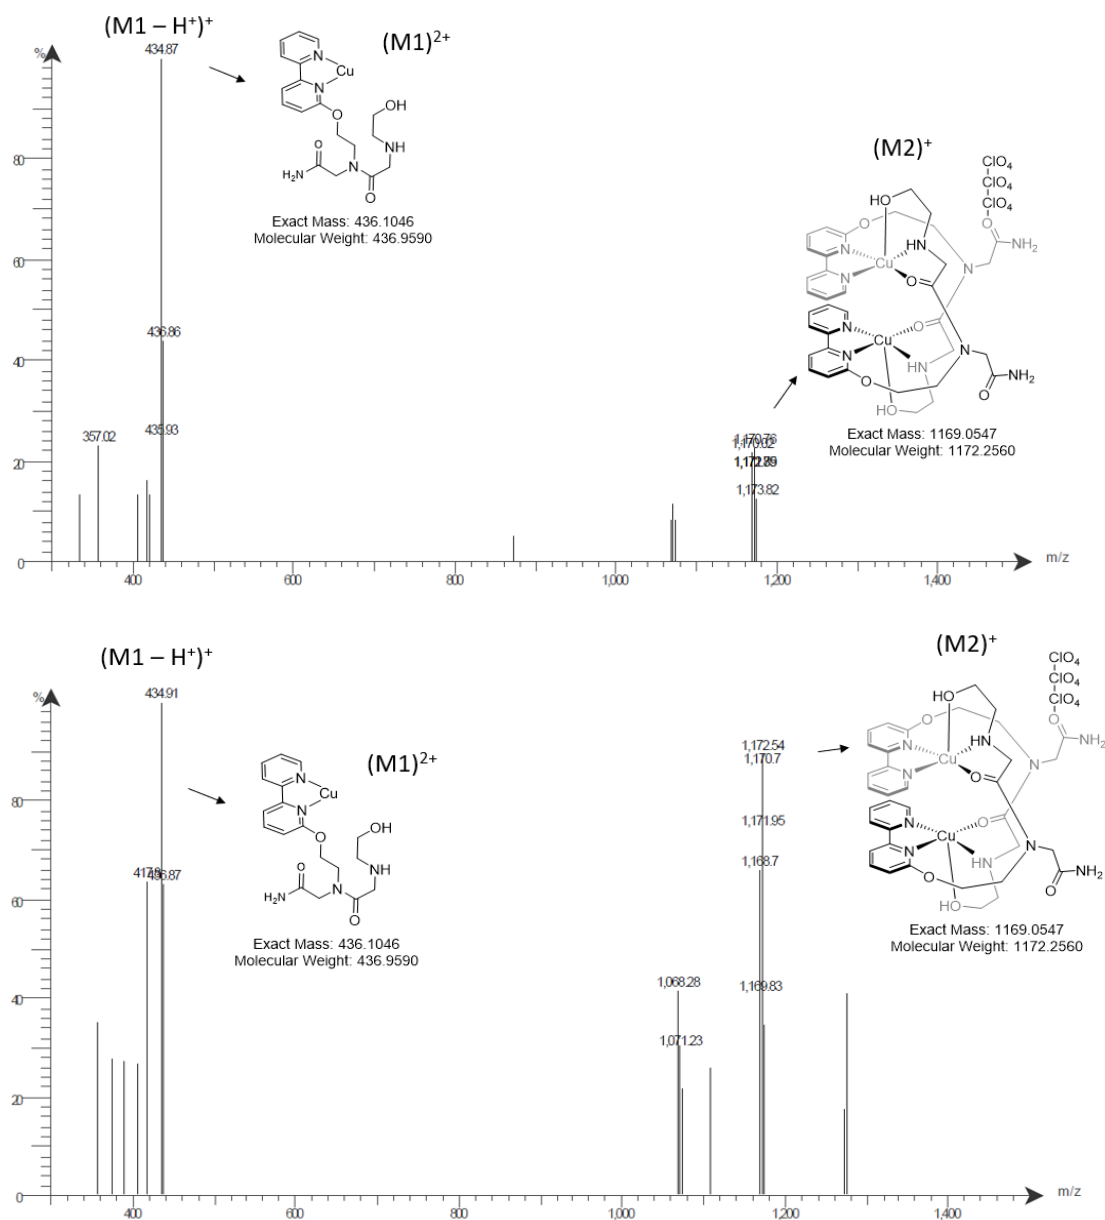

Figure S10. ESI-MS of isolated crystal re-dissolved in water,  $\{[Cu_2(\mathbf{BE})_2](ClO_4)_3\}^+$ . Top: ESI voltage = 3500 V; down: ESI voltage = 1500 V. \*In ESI-MS, we observed the mass of both monomer ( $M1$ ) and dimer ( $M2$ ). However, in further study of this work, we understand that the self-assembled di-nuclear structure is possible to dissociate in specific conditions, but not in pure water which is the condition of this measurement. Since the flow of the ESI-MS instrument contains ACN with 0.1% formic acid, as well as high capillary temperature 250 °C and high ESI voltage 3500 V, the dimer structure is very likely to be decomposed under such extreme conditions. To simply prove it, we decrease the ESI voltage from 3500 V (Top) to 1500 V (down) for another measurement. The ratio of the intensity between dimer and monomer increased from ~0.25 (~25% vs. 100%) to 0.9 (~90% vs. 100%). Therefore, the monomer signal seems inevitable, but it is mostly generated by the process of the ESI-MS measurement.

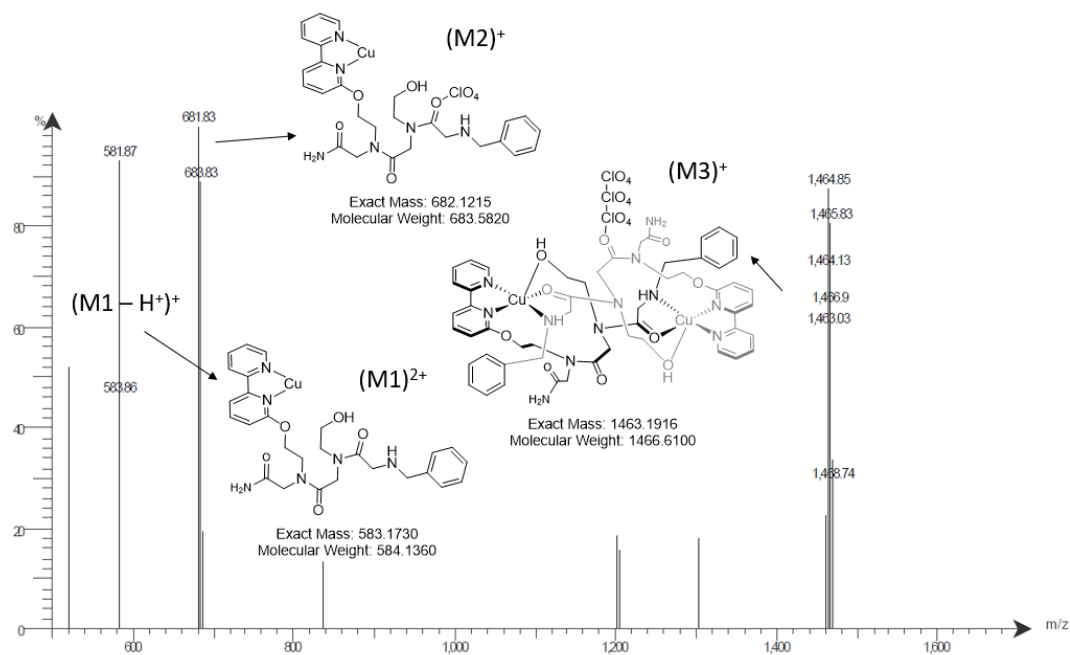

Figure S11. ESI-MS of isolated crystal re-dissolved in water,  $\{[Cu_2(\text{BEBenzyl})_2](ClO_4)_3\}^+$ .

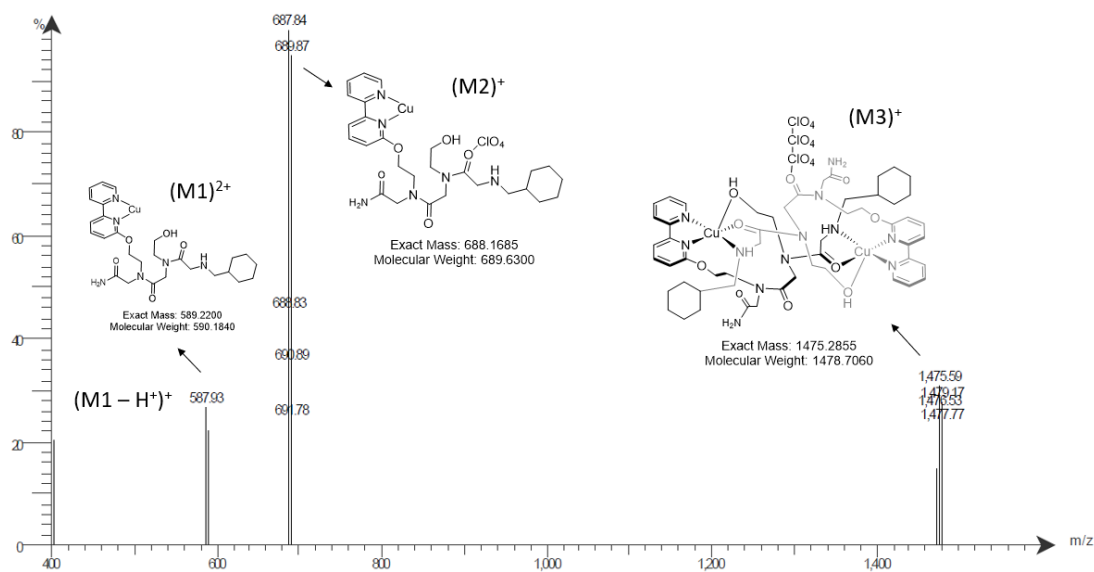

Figure S12. ESI-MS of isolated crystal re-dissolved in water,  $\{[Cu_2(\text{BECyclohexyl})_2](ClO_4)_3\}^+$ .





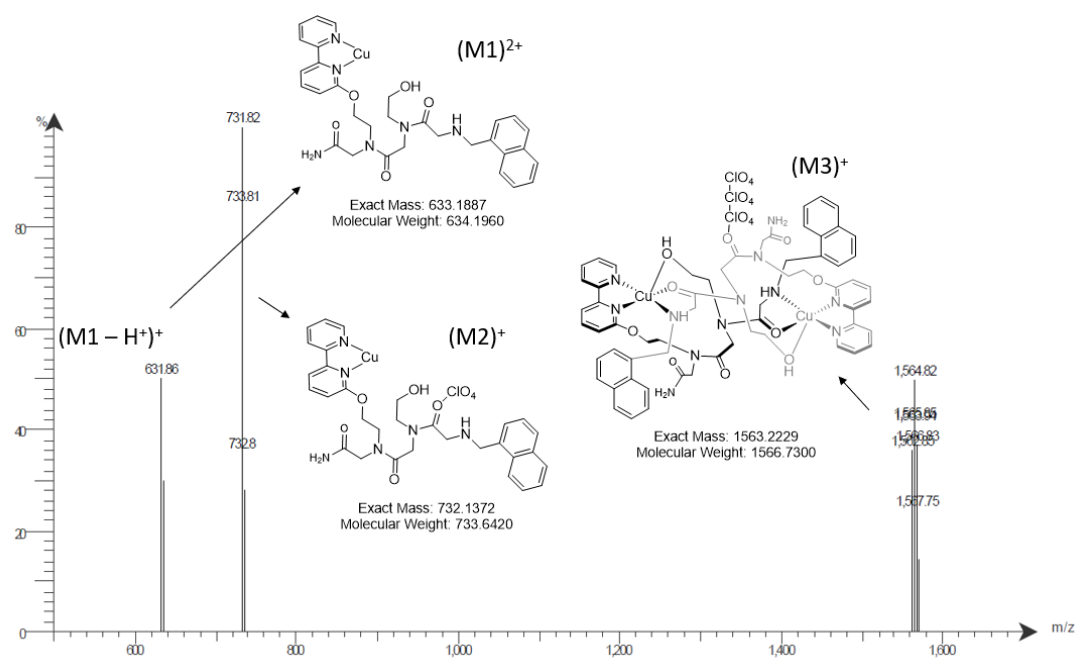

Figure S15. ESI-MS of isolated crystal re-dissolved in water,  $[\text{Cu}_2(\text{BENapthyl})_2](\text{ClO}_4)_3^+$ .

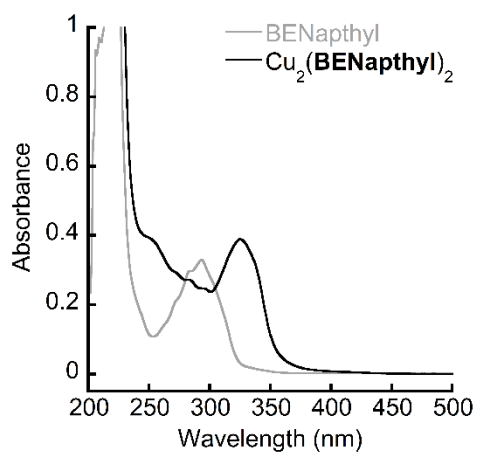

Figure S16. UV-Vis of 20  $\mu\text{M}$  BENaphthyl and 20  $\mu\text{M}$  complex  $\text{Cu}_2(\text{BENaphthyl})_2$  in water.

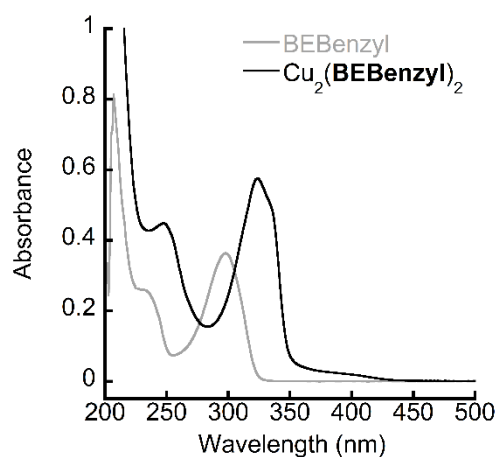

Figure S17. UV-Vis of 20  $\mu\text{M}$  BEBenzyl and 20  $\mu\text{M}$  complex  $\text{Cu}_2(\text{BEBenzyl})_2$  in water.

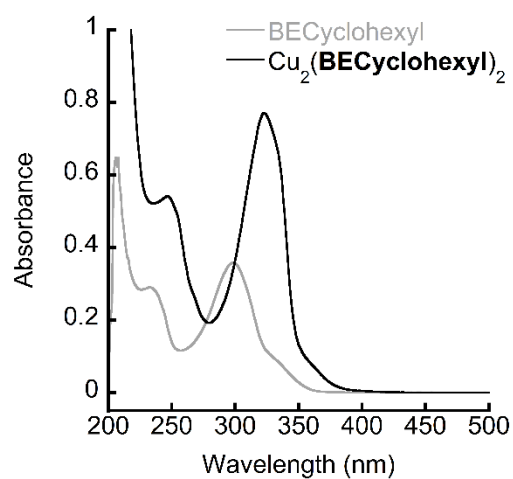

Figure S18. UV-Vis of 20  $\mu\text{M}$  BECyclohexyl and 20  $\mu\text{M}$  complex  $\text{Cu}_2(\text{BECyclohexyl})_2$  in water.

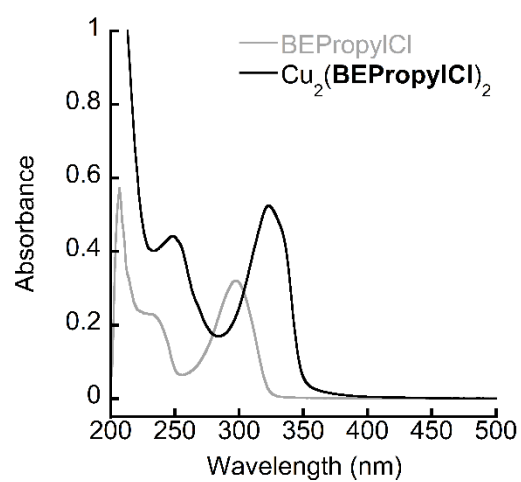

Figure S19. UV-Vis of 20  $\mu\text{M}$  BEPropylCl and 20  $\mu\text{M}$  complex  $\text{Cu}_2(\text{BEPropylCl})_2$  in water.

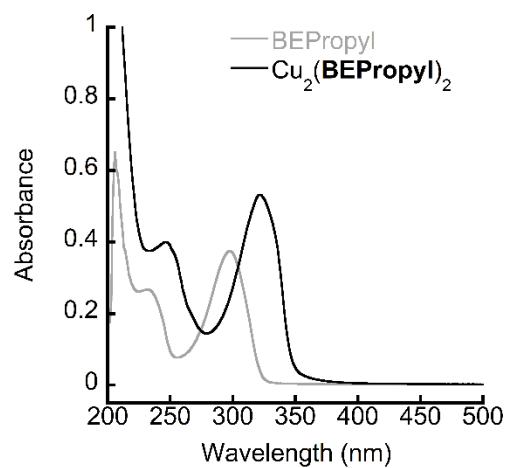

Figure S20. UV-Vis of 20  $\mu\text{M}$  BEPropyl and 20  $\mu\text{M}$  complex  $\text{Cu}_2(\text{BEPropyl})_2$  in water.

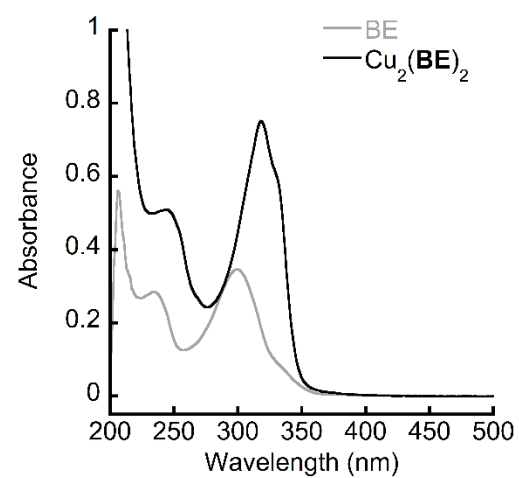

Figure S21. UV-Vis of 20  $\mu\text{M}$  BE and 20  $\mu\text{M}$  complex  $\text{Cu}_2(\text{BE})_2$  in water.

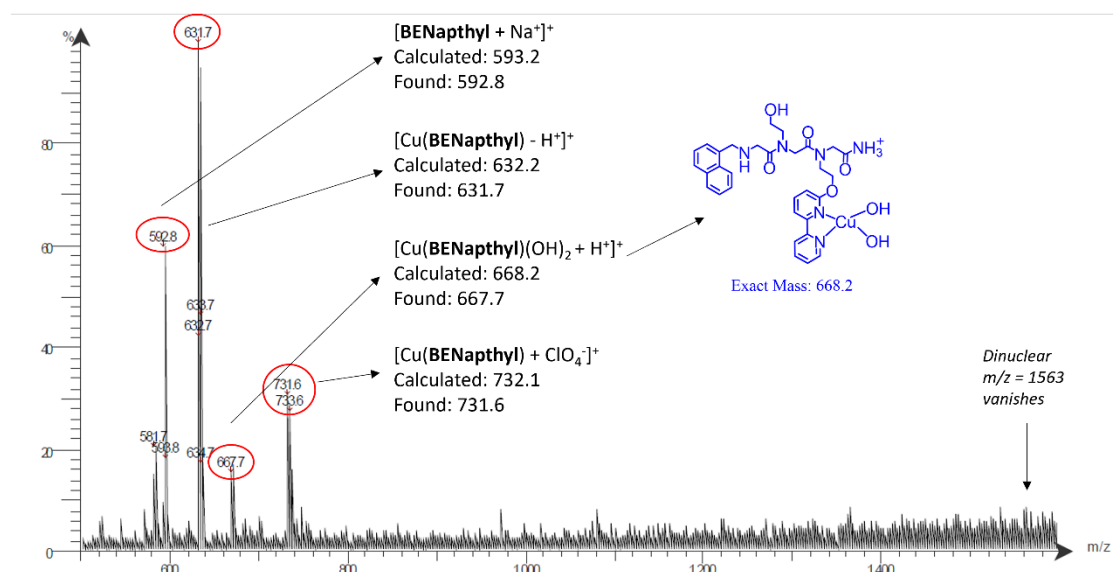

Figure S22. ESI-MS of CuBENapthyl in 0.1 M PBS at pH 11.

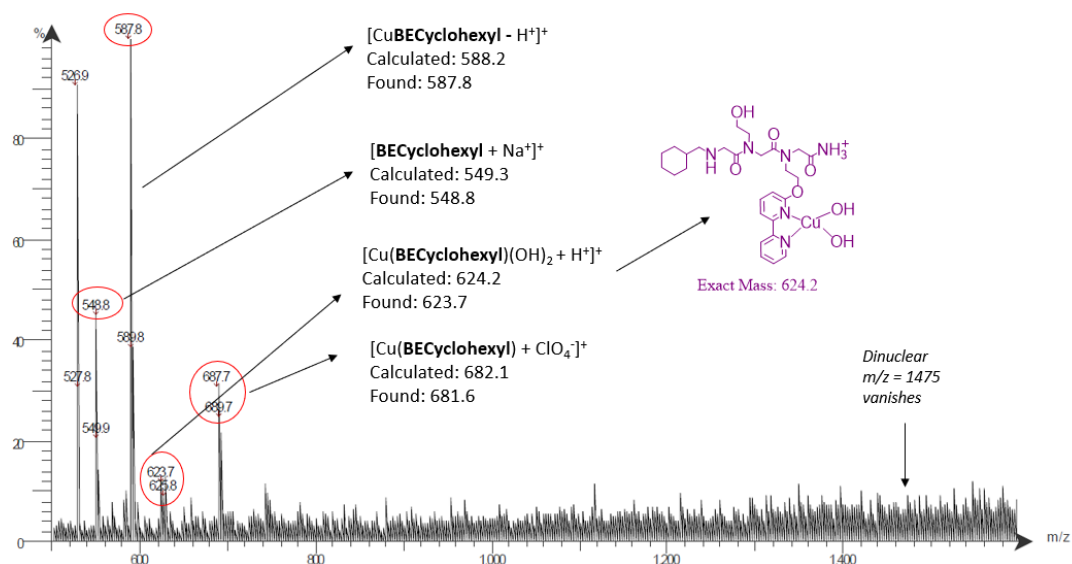

Figure S23. ESI-MS of CuBECyclohexyl in 0.1 M PBS at pH 11.

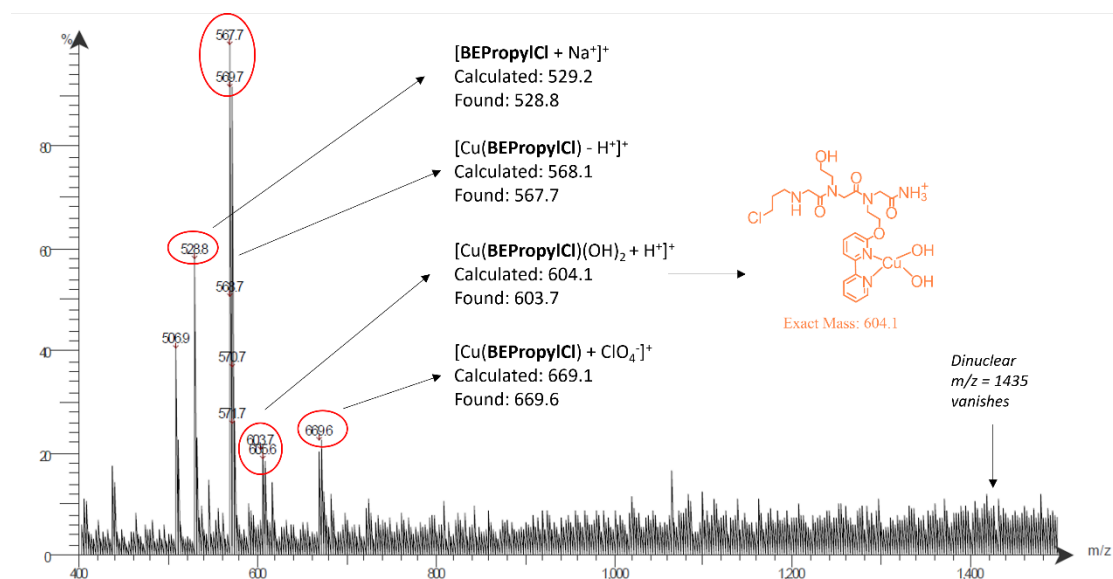

Figure S24. ESI-MS of  $\text{CuBEPropylCl}$  in 0.1 M PBS at pH 11.

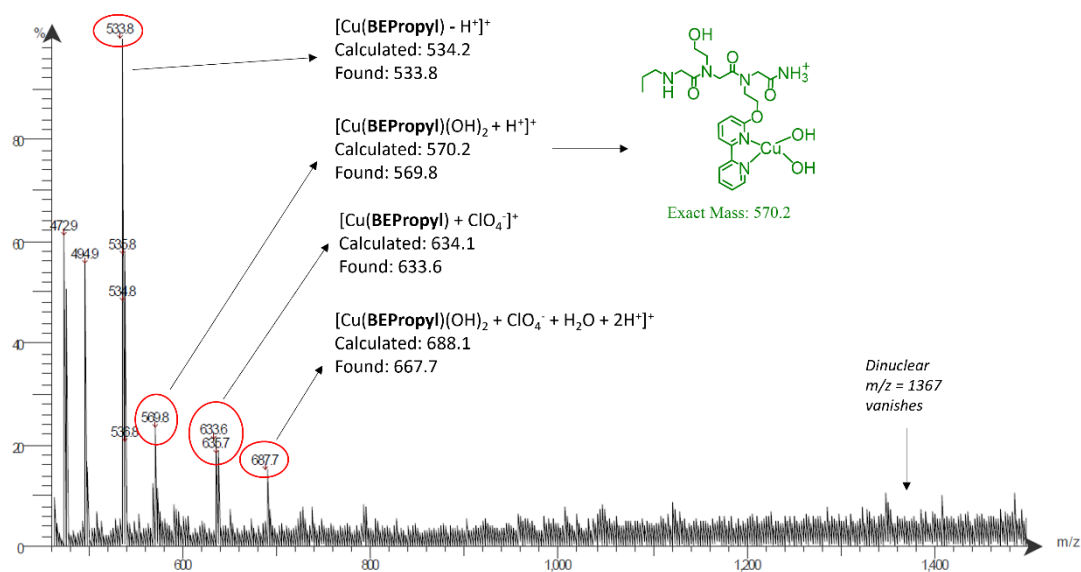

Figure S25. ESI-MS of  $\text{CuBEPropyl}$  in 0.1 M PBS at pH 11.

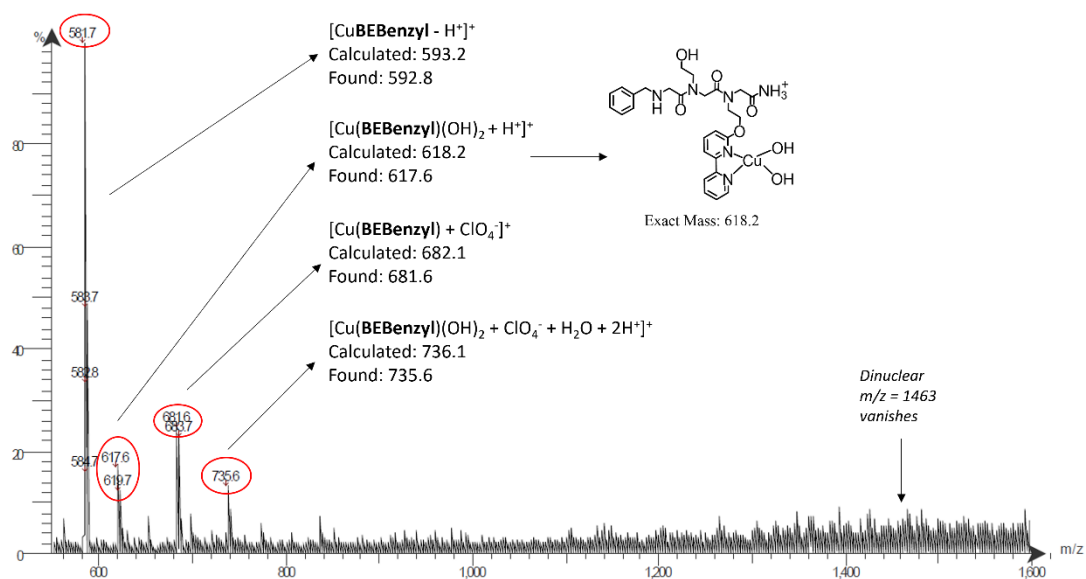

Figure S26. ESI-MS of CuBEBenzyl in 0.1 M PBS at pH 11.

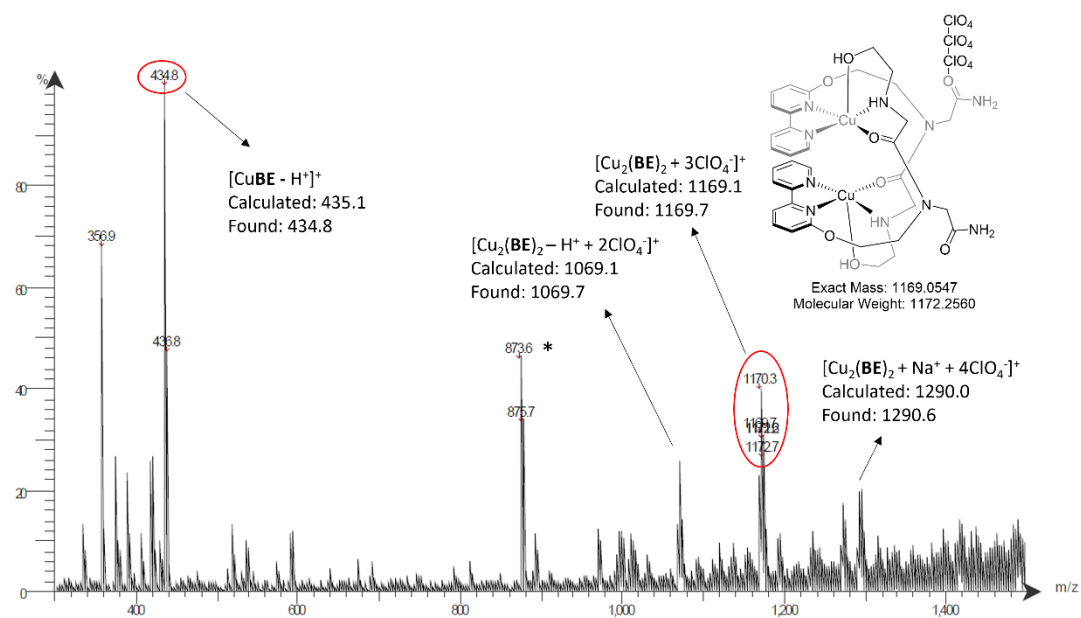

Figure S27. ESI-MS of  $\text{Cu}_2(\text{BE})_2$  in 0.1 M PBS at pH 11. The mass signal marked with "\*" is an unknown species. We suspected that it could be  $[\text{Cu}_2(\text{BE})_2]^{4+}$  whose calculated m/z is 872.2, but since ESI-MS present +1 signal, this hypothesis should be eliminated.

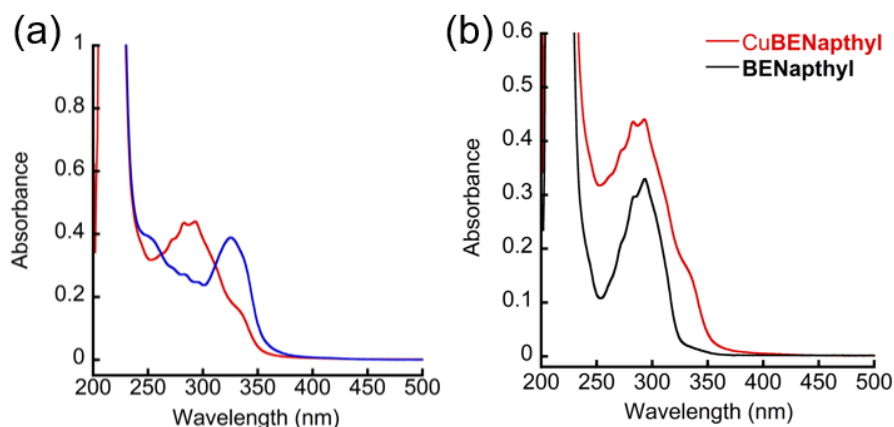

Figure S28. (a). UV-Vis of solid  $\text{Cu}_2(\text{BENapthyl})_2$  dissolved in water (blue line) and 0.1 M PBS at pH 11 (red line); (b) UV-Vis of comparison between ligand and complex in 0.1 M PBS at pH 11. All the concentrations are consistent with 20  $\mu\text{M}$ .

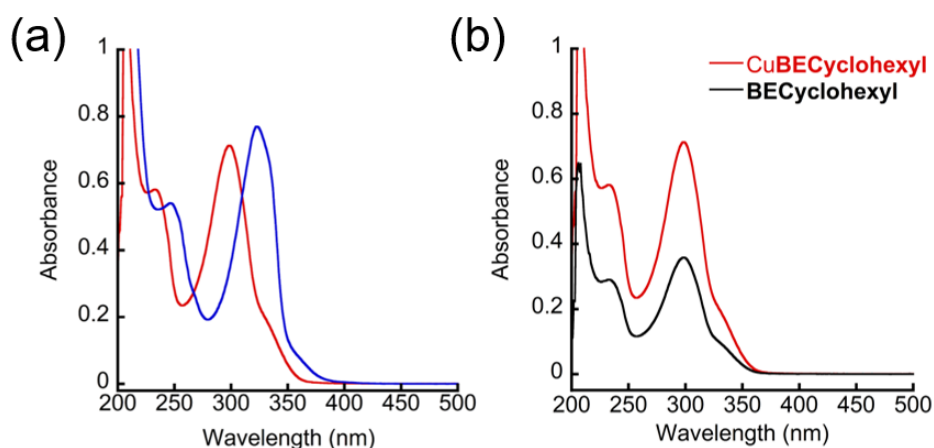

Figure S29. (a) UV-Vis of solid  $\text{Cu}_2(\text{BECyclohexyl})_2$  dissolved in water (blue line) and 0.1 M PBS at pH 11 (red line); (b) UV-Vis of comparison between ligand and complex in 0.1 M PBS at pH 11. All the concentrations are consistent with 20  $\mu\text{M}$ .

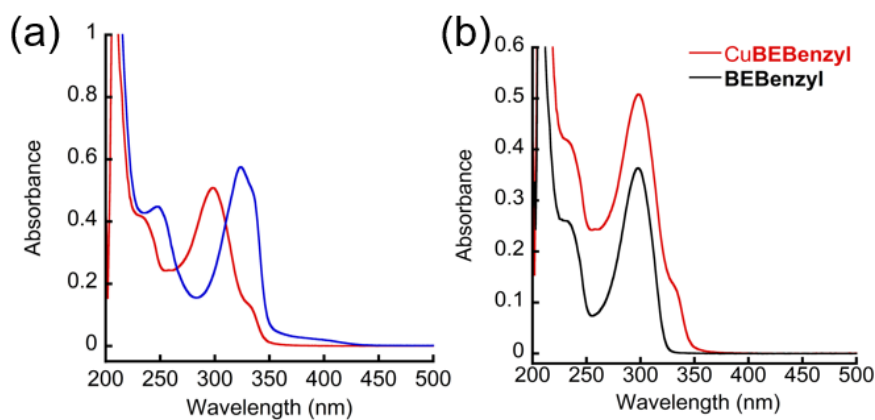

Figure S30. (a) UV-Vis of solid  $\text{Cu}_2(\text{BEBenzyl})_2$  dissolved in water (blue line) and 0.1 M PBS at pH 11 (red line). (b) UV-Vis of comparison between ligand and complex in 0.1 M PBS at pH 11. All the concentrations are consistent with 20  $\mu\text{M}$ .

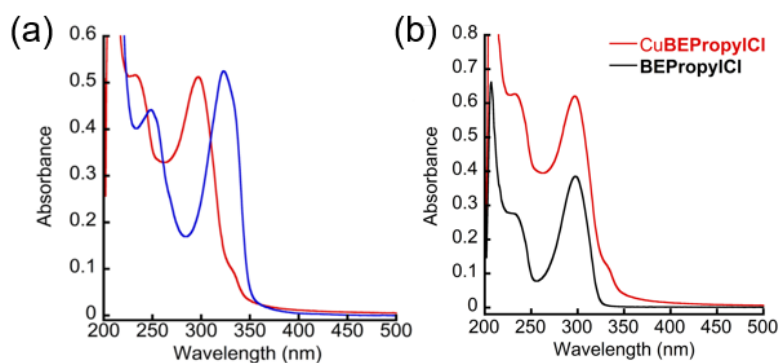

Figure S31. (a) UV-Vis of solid  $\text{Cu}_2(\text{BEPropylCl})_2$  dissolved in water (blue line) and 0.1 M PBS at pH 11 (red line). (b) UV-Vis of comparison between ligand and complex in 0.1 M PBS at pH 11. All the concentrations are consistent with  $\sim 20 \mu\text{M}$ .

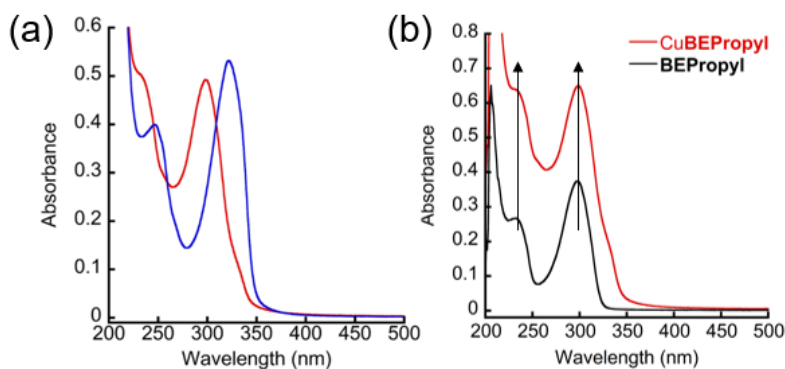

Figure S32. (a) UV-Vis of solid  $\text{Cu}_2(\text{BEPropyl})_2$  dissolved in water (blue line) and 0.1 M PBS at pH 11 (red line). (b) UV-Vis of comparison between ligand and complex in 0.1 M PBS at pH 11. All the concentrations are consistent with  $\sim 20 \mu\text{M}$ .

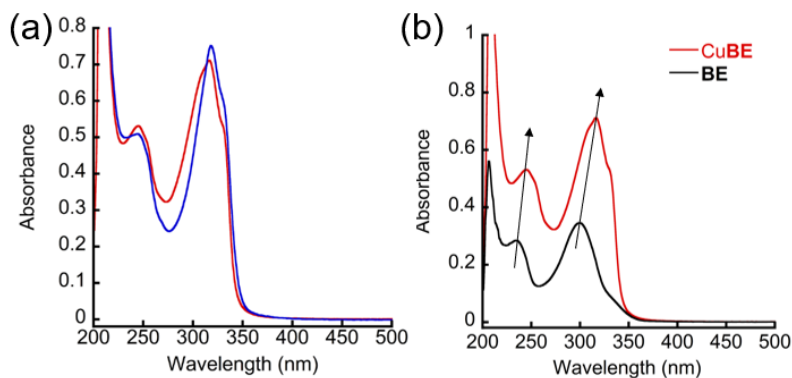

Figure S33. (a) UV-Vis of solid  $\text{Cu}_2(\text{BE})_2$  dissolved in water (blue line) and 0.1 M PBS at pH 11 (red line). (b) UV-Vis of comparison between ligand and complex in 0.1 M PBS at pH 11. All the concentrations are consistent with  $\sim 20 \mu\text{M}$ .



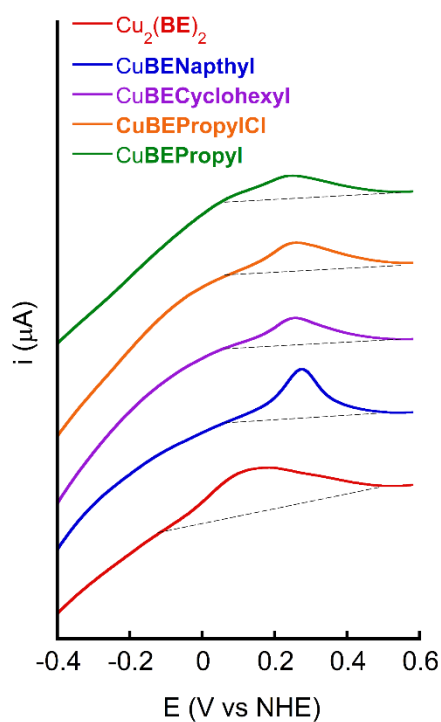

Figure S34. CV scans of 0.5 mM different catalysts under the same conditions that in 0.1 M PBS at pH 11 using glassy carbon as working electrode at scan rate 100 mV/s.

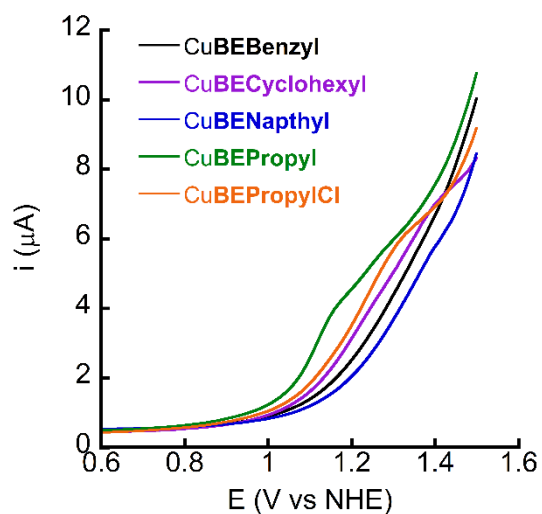

Figure S35. DPVs of 0.1 M phosphate buffer solution at pH 11 in the presence of 0.5 mM  $\text{CuBENapthyl}$ ,  $\text{CuBECyclohexyl}$ ,  $\text{CuBEBenzyl}$ ,  $\text{CuBEPropylCl}$ , and  $\text{CuBEPropyl}$ .

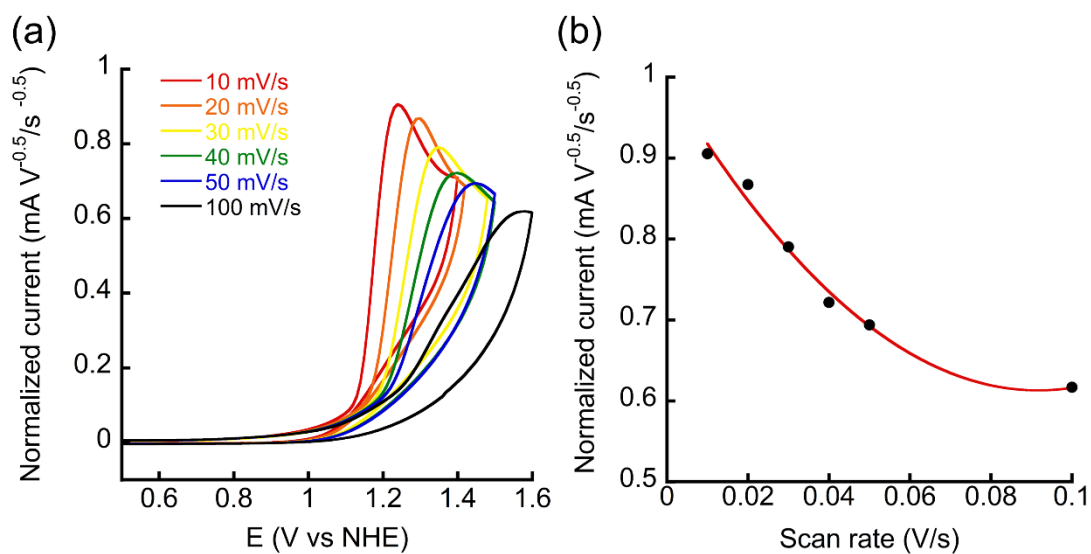

Figure S36. (a) Normalized CVs from the CVs of 0.5 mM Cu<sub>2</sub>(BE)<sub>2</sub> at different scan rates in 0.1 M PBS at pH 11.0. (b) The normalized current of the catalytic peak versus corresponding scan rates. The normalized current is reverse dependent on the scan rate, indicating a catalytic behavior happens.

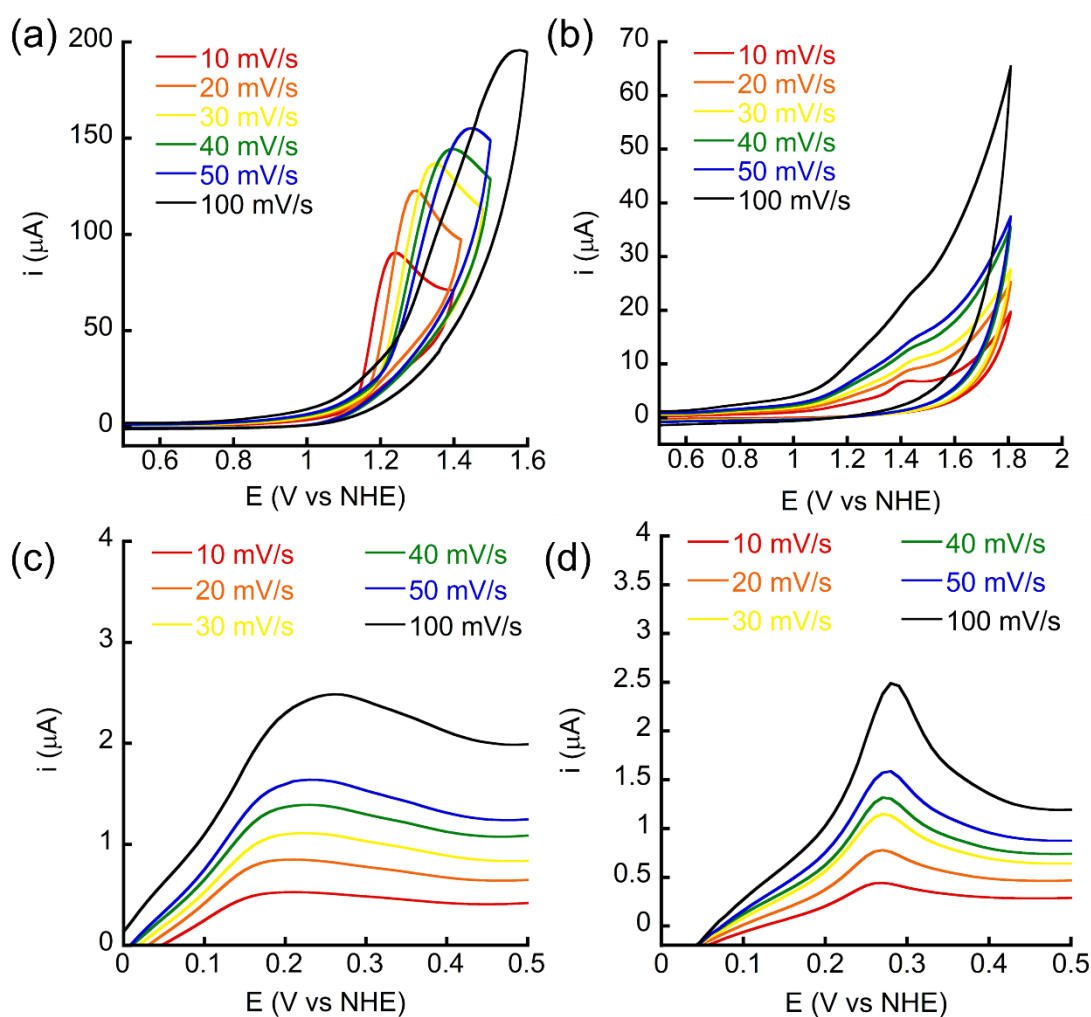

Figure S37. CVs of (a & c) 0.5 mM Cu<sub>2</sub>(BE)<sub>2</sub> or (c & d) 0.5 mM CuBENapthyl in 0.1 M PBS at pH 11 at various scan rates.

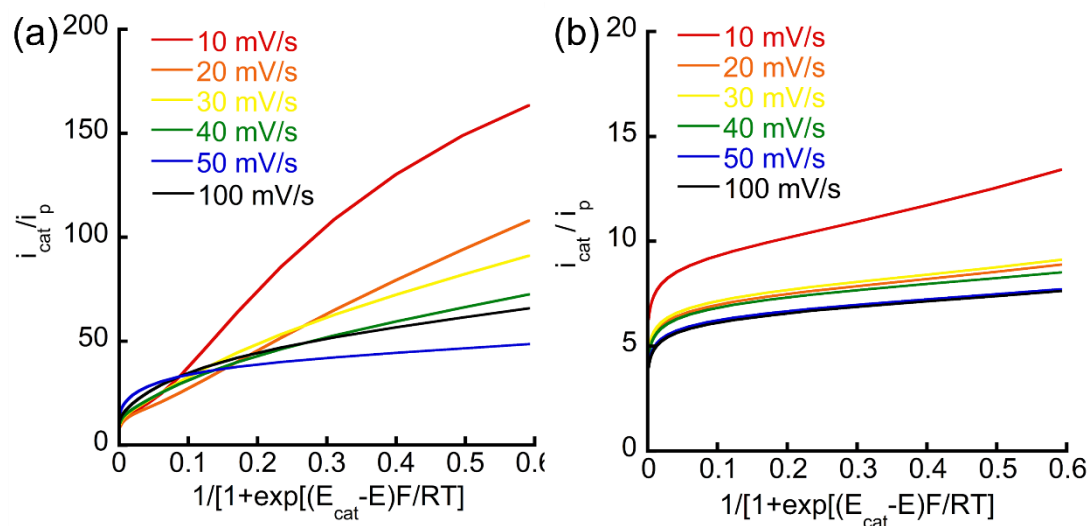

Figure S38. The experimental data of CVs of (a) 0.5 mM  $\text{Cu}_2(\text{BE})_2$  or (b) 0.5 mM  $\text{CuBENaphthyl}$  in 0.1 M PBS at pH 11 used for FOWA at various scan rates. The data are extracted for Figure 3b.

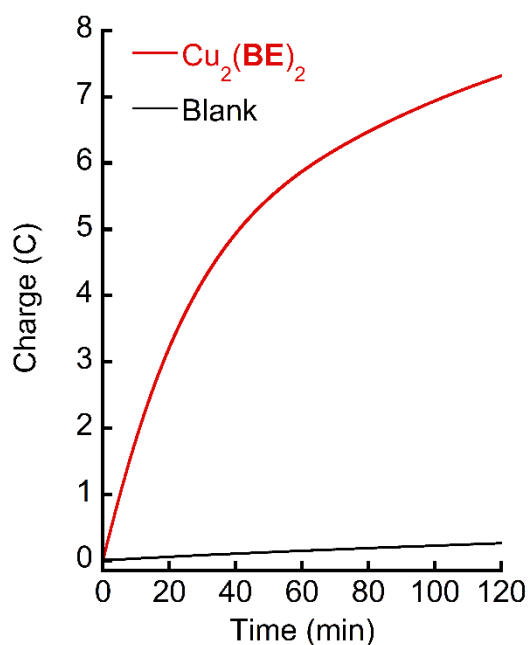

Figure S39. Accumulated charge of the CPE experiments using 0.5 mM  $\text{Cu}_2(\text{BE})_2$  or without any catalyst as blank in 0.1 M PBS at pH 11 using ITO as working electrode at applied potential +1.25 V vs NHE.

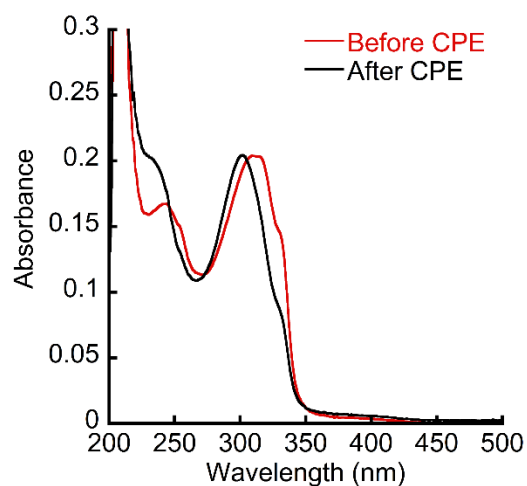

Figure S40. UV-Vis of 0.5 mM  $\text{Cu}_2(\text{BE})_2$  in 0.1 M PBS at pH 11 before and after the CPE experiment using ITO as working electrode at applied potential +1.25 V vs NHE.

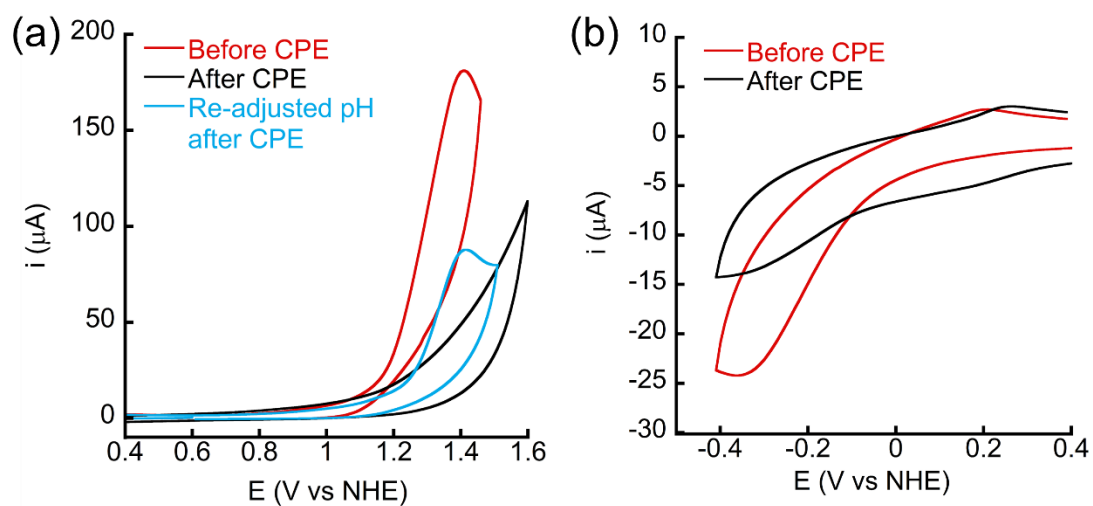

Figure S41. CVs of 0.5 mM  $\text{Cu}_2(\text{BE})_2$  in 0.1 M PBS at pH 11 before and after the CPE experiment using ITO as working electrode at applied potential +1.25 V vs NHE.

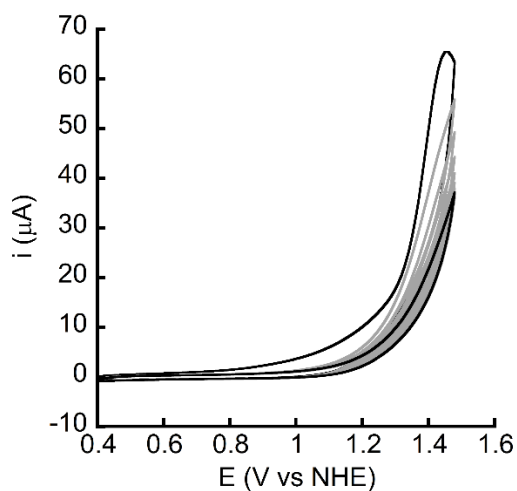

Figure S42. Ten continuous CV scans of a solution of 0.25 mM  $\text{Cu}_2(\text{BE})_2$  in 0.1 M PBS at pH 11 using glassy carbon as working electrode at scan rate 100 mV/s.

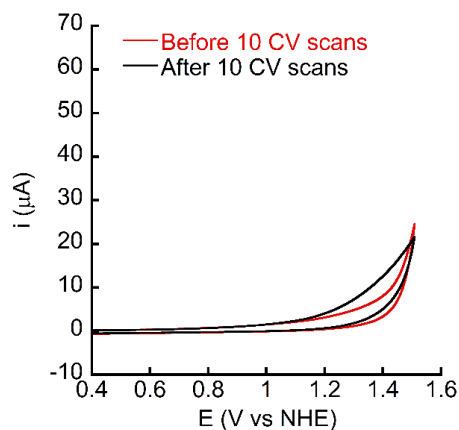

Figure S43. CVs of glassy carbon electrode in fresh 0.1 M PBS at pH 11 without catalyst before and after the ten continuous CV scans of a solution of 0.25 mM  $\text{Cu}_2(\text{BE})_2$  in Figure S42.

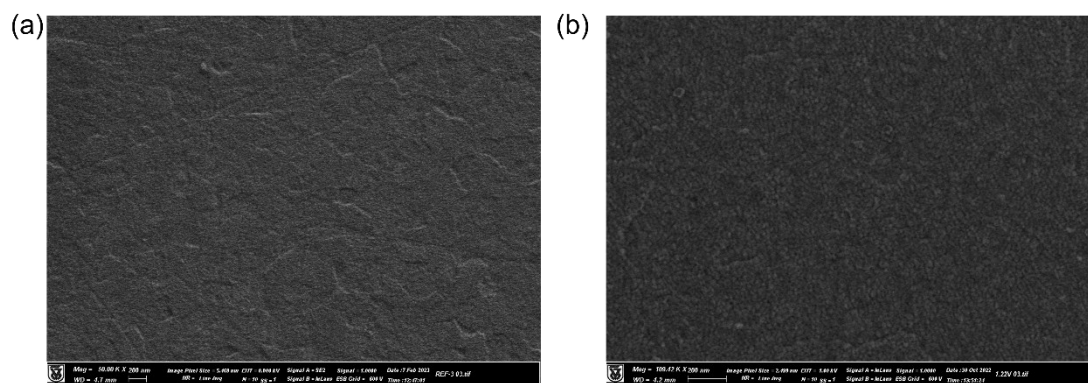

Figure S44. HR-SEM images of (a) the fresh ITO electrode and (b) the after 2-hour CPE experiment at +1.25 V applied potential in 0.1 M PBS at pH 11 containing 0.5 mM  $\text{Cu}_2(\text{BE})_2$ .

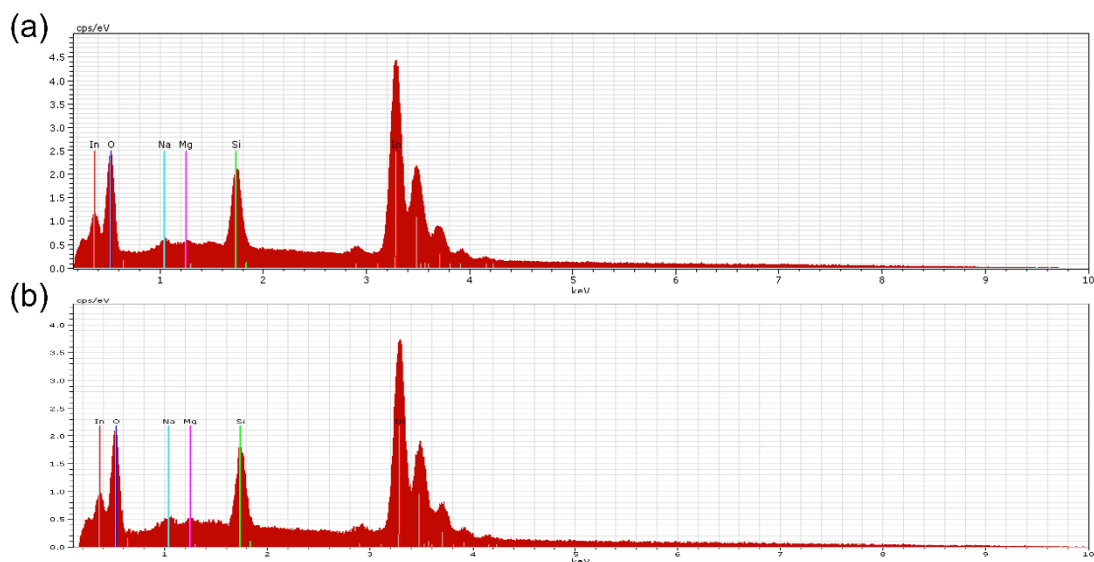

Figure S45. Energy-dispersive X-ray spectroscopy (EDX) analysis of the ITO electrode (a) before and (b) after electrolysis; no Cu element was detected at  $\sim 8$  keV ( $K\alpha$ ) and  $\sim 9$  keV ( $K\beta$ ). For confirmation of sample composition, an acceleration voltage of 10 kV (from 1kV) was used. This higher acceleration voltage was needed for sufficient X-ray emission from the specimens.

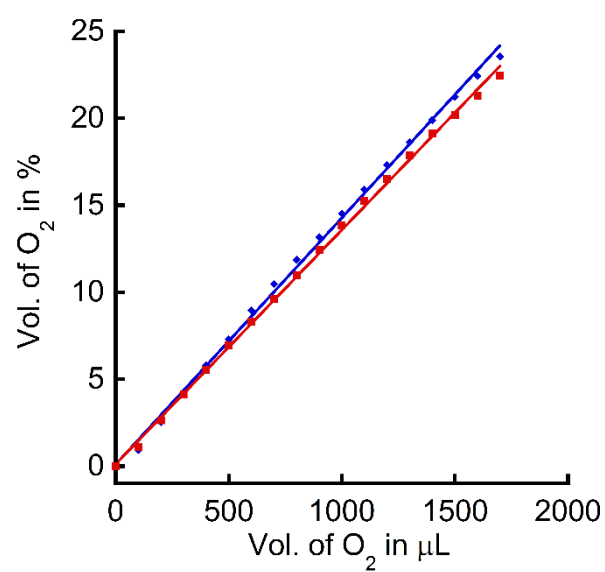

Figure S46. Calibration curve for the measure of evolved O<sub>2</sub> in μL from %. [Red line = experiment 1 and blue line = experiment 2 and then take the average].

## Supporting Tables:

Table S1: Crystal data of complexes Cu<sub>2</sub>(BECyclohexyl)<sub>2</sub>, Cu<sub>2</sub>(BEPropylCl)<sub>2</sub>, Cu<sub>2</sub>(BEPropyl)<sub>2</sub>.

| Complex                                    | Cu <sub>2</sub> (BECyclohexyl) <sub>2</sub>                                                                     | Cu <sub>2</sub> (BEPropylCl) <sub>2</sub>                                                       | Cu <sub>2</sub> (BEPropyl) <sub>2</sub>                                                         |
|--------------------------------------------|-----------------------------------------------------------------------------------------------------------------|-------------------------------------------------------------------------------------------------|-------------------------------------------------------------------------------------------------|
| Formula                                    | C <sub>68</sub> H <sub>102</sub> Cu <sub>2</sub> F <sub>24</sub> N <sub>16</sub> O <sub>14</sub> P <sub>4</sub> | C <sub>52</sub> H <sub>78</sub> Cl <sub>6</sub> Cu <sub>2</sub> N <sub>12</sub> O <sub>28</sub> | C <sub>46</sub> H <sub>64</sub> Cl <sub>4</sub> Cu <sub>2</sub> N <sub>12</sub> O <sub>26</sub> |
| Formula weight                             | 2074.61                                                                                                         | 1659.04                                                                                         | 1469.97                                                                                         |
| <i>T</i> (K)                               | 100.15                                                                                                          | 100.15                                                                                          | 100.15                                                                                          |
| Crystal color                              | blue                                                                                                            | blue                                                                                            | blue                                                                                            |
| Crystal system                             | triclinic                                                                                                       | triclinic                                                                                       | triclinic                                                                                       |
| Space group                                | P-1                                                                                                             | P-1                                                                                             | P-1                                                                                             |
| <i>a</i> (Å)                               | 13.4061(2)                                                                                                      | 11.5444(5)                                                                                      | 11.1225(3)                                                                                      |
| <i>b</i> (Å)                               | 13.5461(3)                                                                                                      | 12.1635(6)                                                                                      | 12.4153(3)                                                                                      |
| <i>c</i> (Å)                               | 13.6972(3)                                                                                                      | 13.7985(7)                                                                                      | 13.9658(3)                                                                                      |
| <i>α</i> (°)                               | 113.6275(19)                                                                                                    | 102.470(4)                                                                                      | 103.308(2)                                                                                      |
| <i>β</i> (°)                               | 101.1796(16)                                                                                                    | 111.799(5)                                                                                      | 110.276(2)                                                                                      |
| <i>γ</i> (°)                               | 95.4695(16)                                                                                                     | 100.241(4)                                                                                      | 101.505(2)                                                                                      |
| <i>V</i> (Å <sup>3</sup> )                 | 2193.82(8)                                                                                                      | 1683.98(15)                                                                                     | 1676.06(8)                                                                                      |
| <i>Z</i>                                   | 1                                                                                                               | 1                                                                                               | 1                                                                                               |
| Crystal dimensions (mm)                    | 0.36 × 0.33 × 0.24                                                                                              | 0.24 × 0.18 × 0.15                                                                              | 0.21 × 0.18 × 0.15                                                                              |
| <i>D<sub>c</sub></i> (g cm <sup>-3</sup> ) | 1.570                                                                                                           | 1.636                                                                                           | 1.456                                                                                           |
| <i>F</i> (000)                             | 1068.0                                                                                                          | 858.0                                                                                           | 758.0                                                                                           |
| <i>λ</i> (K $\alpha$ ) (Å)                 | (Cu) 1.54184                                                                                                    | (Mo) 0.71073                                                                                    | (Mo) 0.71073                                                                                    |
| <i>θ</i> Range (°)                         | 6.85 to 161.444                                                                                                 | 4.522 to 59.662                                                                                 | 5.27 to 60.14                                                                                   |
| Absorption correction                      | multi-scan                                                                                                      | multi-scan                                                                                      | multi-scan                                                                                      |
| <i>R</i> factor (%)                        | 8.40                                                                                                            | 8.54                                                                                            | 4.00                                                                                            |
| <i>wR</i> <sub>2</sub> index (reflections) | 0.2433                                                                                                          | 0.0936                                                                                          | 0.1070                                                                                          |
| Goodness-of-fit                            | 1.020                                                                                                           | 1.036                                                                                           | 1.026                                                                                           |

$\text{Cu}_2(\text{BECyclohexyl})_2$ :

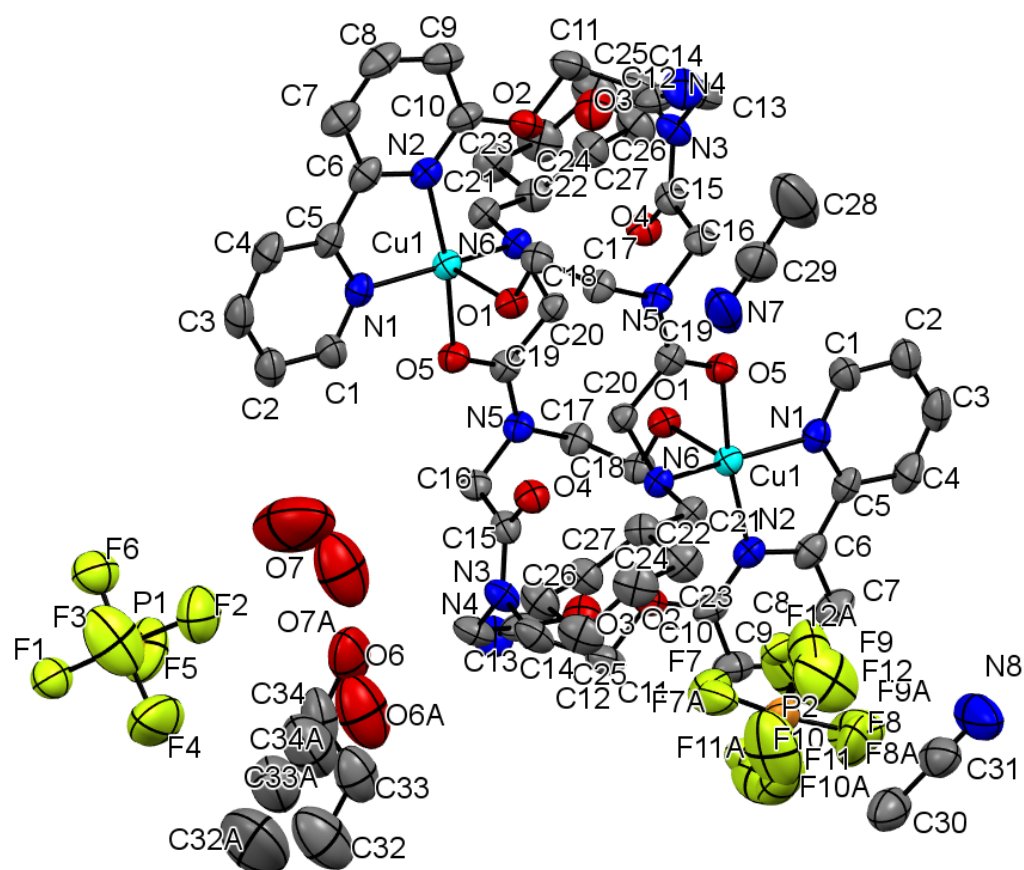



Table S2. Bond Lengths for Cu<sub>2</sub>(BECyclohexyl)<sub>2</sub>.

| Atom | Atom             | Length/Å | Atom | Atom | Length/Å  |
|------|------------------|----------|------|------|-----------|
| Cu1  | O1               | 2.249(2) | C17  | C18  | 1.514(5)  |
| Cu1  | O5 <sup>1</sup>  | 1.986(2) | C19  | C20  | 1.497(5)  |
| Cu1  | N1               | 1.981(3) | C21  | C22  | 1.537(5)  |
| Cu1  | N2               | 2.053(3) | C22  | C23  | 1.534(5)  |
| Cu1  | N6 <sup>1</sup>  | 2.002(3) | C22  | C27  | 1.522(6)  |
| O1   | C18              | 1.428(4) | C23  | C24  | 1.537(6)  |
| O2   | C10              | 1.356(5) | C24  | C25  | 1.529(8)  |
| O2   | C11              | 1.448(5) | C25  | C26  | 1.503(7)  |
| O3   | C14              | 1.239(6) | C26  | C27  | 1.536(5)  |
| O4   | C15              | 1.223(4) | P1   | F1   | 1.556(4)  |
| O5   | Cu1 <sup>1</sup> | 1.986(2) | P1   | F2   | 1.649(5)  |
| O5   | C19              | 1.256(4) | P1   | F3   | 1.503(5)  |
| N1   | C1               | 1.332(5) | P1   | F4   | 1.602(6)  |
| N1   | C5               | 1.334(5) | P1   | F5   | 1.567(5)  |
| N2   | C6               | 1.365(5) | P1   | F6   | 1.559(4)  |
| N2   | C10              | 1.336(5) | P2   | F7   | 1.491(9)  |
| N3   | C12              | 1.468(5) | P2   | F7A  | 1.545(10) |
| N3   | C13              | 1.451(5) | P2   | F8   | 1.551(9)  |
| N3   | C15              | 1.349(5) | P2   | F8A  | 1.546(11) |
| N4   | C14              | 1.315(6) | P2   | F9   | 1.648(9)  |
| N5   | C16              | 1.467(5) | P2   | F9A  | 1.601(13) |
| N5   | C17              | 1.478(4) | P2   | F10  | 1.456(10) |
| N5   | C19              | 1.334(4) | P2   | F10A | 1.490(11) |
| N6   | Cu1 <sup>1</sup> | 2.002(3) | P2   | F11  | 1.460(10) |
| N6   | C20              | 1.474(4) | P2   | F11A | 1.568(10) |
| N6   | C21              | 1.496(4) | P2   | F12  | 1.479(9)  |
| C1   | C2               | 1.397(6) | P2   | F12A | 1.497(8)  |
| C2   | C3               | 1.387(7) | O6   | C34  | 1.457(17) |
| C3   | C4               | 1.368(7) | C32  | C33  | 1.459(19) |
| C4   | C5               | 1.410(5) | C33  | C34  | 1.35(2)   |
| C5   | C6               | 1.476(6) | O6A  | C34A | 1.69(5)   |
| C6   | C7               | 1.367(6) | C32A | C33A | 1.35(6)   |
| C7   | C8               | 1.379(8) | C33A | C34A | 1.00(5)   |
| C8   | C9               | 1.378(7) | N7   | C29  | 1.158(8)  |

|     |     |          |     |     |           |
|-----|-----|----------|-----|-----|-----------|
| C9  | C10 | 1.407(5) | C28 | C29 | 1.425(10) |
| C11 | C12 | 1.520(7) | N8  | C31 | 1.114(9)  |
| C13 | C14 | 1.509(7) | C30 | C31 | 1.437(9)  |
| C15 | C16 | 1.533(5) |     |     |           |

Table S3. Bond Angles for Cu<sub>2</sub>(BECyclohexyl)<sub>2</sub>.

| Atom            | Atom | Atom             | Angle/°    | Atom | Atom | Atom | Angle/°   |
|-----------------|------|------------------|------------|------|------|------|-----------|
| O5 <sup>1</sup> | Cu1  | O1               | 87.25(10)  | N6   | C21  | C22  | 115.7(3)  |
| O5 <sup>1</sup> | Cu1  | N2               | 171.74(12) | C23  | C22  | C21  | 109.1(3)  |
| O5 <sup>1</sup> | Cu1  | N6 <sup>1</sup>  | 82.41(11)  | C27  | C22  | C21  | 111.6(3)  |
| N1              | Cu1  | O1               | 95.13(11)  | C27  | C22  | C23  | 111.6(3)  |
| N1              | Cu1  | O5 <sup>1</sup>  | 89.86(12)  | C22  | C23  | C24  | 111.0(4)  |
| N1              | Cu1  | N2               | 81.92(13)  | C25  | C24  | C23  | 111.1(4)  |
| N1              | Cu1  | N6 <sup>1</sup>  | 160.48(13) | C26  | C25  | C24  | 109.9(4)  |
| N2              | Cu1  | O1               | 94.21(10)  | C25  | C26  | C27  | 111.9(4)  |
| N6 <sup>1</sup> | Cu1  | O1               | 102.33(11) | C22  | C27  | C26  | 112.1(3)  |
| N6 <sup>1</sup> | Cu1  | N2               | 105.16(12) | F1   | P1   | F2   | 178.1(3)  |
| C18             | O1   | Cu1              | 121.0(2)   | F1   | P1   | F4   | 90.4(3)   |
| C10             | O2   | C11              | 116.7(3)   | F1   | P1   | F5   | 93.6(2)   |
| C19             | O5   | Cu1 <sup>1</sup> | 114.1(2)   | F1   | P1   | F6   | 92.2(2)   |
| C1              | N1   | Cu1              | 124.7(3)   | F3   | P1   | F1   | 95.3(3)   |
| C1              | N1   | C5               | 120.2(3)   | F3   | P1   | F2   | 84.3(3)   |
| C5              | N1   | Cu1              | 115.1(3)   | F3   | P1   | F4   | 92.6(5)   |
| C6              | N2   | Cu1              | 111.6(3)   | F3   | P1   | F5   | 170.7(3)  |
| C10             | N2   | Cu1              | 128.2(2)   | F3   | P1   | F6   | 92.7(3)   |
| C10             | N2   | C6               | 120.2(3)   | F4   | P1   | F2   | 87.8(3)   |
| C13             | N3   | C12              | 118.6(3)   | F5   | P1   | F2   | 86.8(3)   |
| C15             | N3   | C12              | 118.9(3)   | F5   | P1   | F4   | 84.8(4)   |
| C15             | N3   | C13              | 122.2(3)   | F6   | P1   | F2   | 89.7(2)   |
| C16             | N5   | C17              | 117.0(3)   | F6   | P1   | F4   | 173.9(4)  |
| C19             | N5   | C16              | 119.8(3)   | F6   | P1   | F5   | 89.5(3)   |
| C19             | N5   | C17              | 123.2(3)   | F7   | P2   | F8   | 165.3(11) |
| C20             | N6   | Cu1 <sup>1</sup> | 107.0(2)   | F7   | P2   | F9   | 92.5(7)   |
| C20             | N6   | C21              | 112.7(3)   | F7A  | P2   | F8A  | 161.0(13) |
| C21             | N6   | Cu1 <sup>1</sup> | 111.2(2)   | F7A  | P2   | F9A  | 92.9(14)  |
| N1              | C1   | C2               | 122.4(4)   | F7A  | P2   | F11A | 92.6(10)  |

|    |     |     |          |      |      |      |           |
|----|-----|-----|----------|------|------|------|-----------|
| C3 | C2  | C1  | 117.7(4) | F8   | P2   | F9   | 88.5(9)   |
| C4 | C3  | C2  | 119.9(4) | F8A  | P2   | F9A  | 73.7(16)  |
| C3 | C4  | C5  | 119.4(4) | F8A  | P2   | F11A | 100.2(13) |
| N1 | C5  | C4  | 120.4(4) | F10  | P2   | F7   | 91.4(9)   |
| N1 | C5  | C6  | 115.8(3) | F10  | P2   | F8   | 103.3(11) |
| C4 | C5  | C6  | 123.8(4) | F10  | P2   | F9   | 81.7(9)   |
| N2 | C6  | C5  | 115.5(3) | F10  | P2   | F11  | 90.8(9)   |
| N2 | C6  | C7  | 121.5(4) | F10  | P2   | F12  | 168.3(9)  |
| C7 | C6  | C5  | 122.9(4) | F10A | P2   | F7A  | 87.8(8)   |
| C6 | C7  | C8  | 118.6(4) | F10A | P2   | F8A  | 79.1(10)  |
| C9 | C8  | C7  | 120.8(4) | F10A | P2   | F9A  | 90.5(11)  |
| C8 | C9  | C10 | 118.3(4) | F10A | P2   | F11A | 86.7(9)   |
| O2 | C10 | C9  | 125.3(4) | F10A | P2   | F12A | 176.4(7)  |
| N2 | C10 | O2  | 114.0(3) | F11  | P2   | F7   | 94.3(9)   |
| N2 | C10 | C9  | 120.6(4) | F11  | P2   | F8   | 86.7(10)  |
| O2 | C11 | C12 | 108.0(3) | F11  | P2   | F9   | 170.0(10) |
| N3 | C12 | C11 | 113.4(4) | F11  | P2   | F12  | 100.9(9)  |
| N3 | C13 | C14 | 111.6(4) | F11A | P2   | F9A  | 173.7(12) |
| O3 | C14 | N4  | 123.5(5) | F12  | P2   | F7   | 88.9(9)   |
| O3 | C14 | C13 | 119.7(4) | F12  | P2   | F8   | 76.5(12)  |
| N4 | C14 | C13 | 116.8(4) | F12  | P2   | F9   | 86.5(8)   |
| O4 | C15 | N3  | 123.1(4) | F12A | P2   | F7A  | 88.8(7)   |
| O4 | C15 | C16 | 118.1(3) | F12A | P2   | F8A  | 104.0(10) |
| N3 | C15 | C16 | 118.8(3) | F12A | P2   | F9A  | 88.6(8)   |
| N5 | C16 | C15 | 111.3(3) | F12A | P2   | F11A | 94.5(5)   |
| N5 | C17 | C18 | 113.4(3) | C34  | C33  | C32  | 112.1(15) |
| O1 | C18 | C17 | 112.0(3) | C33  | C34  | O6   | 113.7(10) |
| O5 | C19 | N5  | 120.9(3) | C34A | C33A | C32A | 149(6)    |
| O5 | C19 | C20 | 117.9(3) | C33A | C34A | O6A  | 139(6)    |
| N5 | C19 | C20 | 121.2(3) | N7   | C29  | C28  | 175.3(9)  |
| N6 | C20 | C19 | 109.3(3) | N8   | C31  | C30  | 178.8(8)  |

**Cu<sub>2</sub>(BEPropylCl)<sub>2</sub>:**

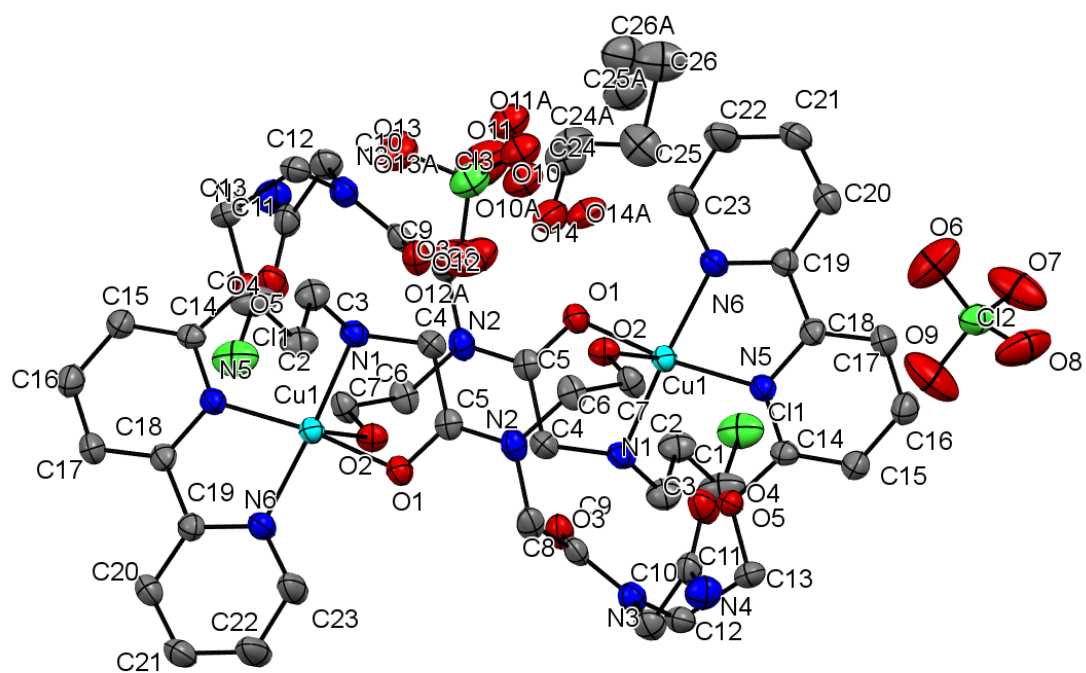

Table S4. Bond Lengths for Cu<sub>2</sub>(BEPropylCl)<sub>2</sub>.

| Atom | Atom             | Length/Å  | Atom | Atom | Length/Å  |
|------|------------------|-----------|------|------|-----------|
| Cu1  | O1               | 1.960(4)  | C6   | C7   | 1.518(8)  |
| Cu1  | O2 <sup>1</sup>  | 2.227(4)  | C8   | C9   | 1.515(9)  |
| Cu1  | N1               | 1.998(5)  | C10  | C11  | 1.537(9)  |
| Cu1  | N5 <sup>1</sup>  | 2.032(5)  | C12  | C13  | 1.502(9)  |
| Cu1  | N6 <sup>1</sup>  | 1.965(5)  | C14  | C15  | 1.381(8)  |
| Cl1  | C1               | 1.778(7)  | C15  | C16  | 1.373(9)  |
| O1   | C5               | 1.254(7)  | C16  | C17  | 1.384(9)  |
| O2   | Cu1 <sup>1</sup> | 2.227(4)  | C17  | C18  | 1.379(8)  |
| O2   | C7               | 1.423(7)  | C18  | C19  | 1.470(8)  |
| O3   | C9               | 1.237(8)  | C19  | C20  | 1.383(8)  |
| O4   | C11              | 1.223(8)  | C20  | C21  | 1.373(10) |
| O5   | C13              | 1.451(7)  | C21  | C22  | 1.383(10) |
| O5   | C14              | 1.343(7)  | C22  | C23  | 1.355(10) |
| N1   | C3               | 1.469(8)  | Cl2  | O6   | 1.411(7)  |
| N1   | C4               | 1.467(8)  | Cl2  | O7   | 1.402(7)  |
| N2   | C5               | 1.330(8)  | Cl2  | O8   | 1.407(6)  |
| N2   | C6               | 1.470(8)  | Cl2  | O9   | 1.419(6)  |
| N2   | C8               | 1.465(8)  | Cl3  | O10  | 1.412(7)  |
| N3   | C9               | 1.339(8)  | Cl3  | O10A | 1.493(16) |
| N3   | C10              | 1.438(8)  | Cl3  | O11  | 1.411(8)  |
| N3   | C12              | 1.465(9)  | Cl3  | O11A | 1.460(16) |
| N4   | C11              | 1.336(9)  | Cl3  | O12  | 1.443(8)  |
| N5   | Cu1 <sup>1</sup> | 2.032(5)  | Cl3  | O12A | 1.399(16) |
| N5   | C14              | 1.349(8)  | Cl3  | O13  | 1.453(8)  |
| N5   | C18              | 1.362(7)  | Cl3  | O13A | 1.458(17) |
| N6   | Cu1 <sup>1</sup> | 1.965(5)  | O14  | C24  | 1.42(3)   |
| N6   | C19              | 1.344(8)  | O14A | C24A | 1.41(4)   |
| N6   | C23              | 1.355(8)  | C24  | C25  | 1.51(4)   |
| C1   | C2               | 1.505(10) | C24A | C25A | 1.57(3)   |
| C2   | C3               | 1.506(10) | C25  | C26  | 1.58(3)   |
| C4   | C5               | 1.501(8)  | C25A | C26A | 1.45(4)   |

Table S5 Bond Angles for Cu<sub>2</sub>(BEPropylCl)<sub>2</sub>.

| Atom            | Atom | Atom             | Angle/°    | Atom | Atom | Atom | Angle/°   |
|-----------------|------|------------------|------------|------|------|------|-----------|
| O1              | Cu1  | O2 <sup>1</sup>  | 87.50(17)  | O4   | C11  | C10  | 121.7(6)  |
| O1              | Cu1  | N1               | 83.60(19)  | N4   | C11  | C10  | 114.3(6)  |
| O1              | Cu1  | N5 <sup>1</sup>  | 172.10(18) | N3   | C12  | C13  | 112.1(5)  |
| O1              | Cu1  | N6 <sup>1</sup>  | 90.47(19)  | O5   | C13  | C12  | 107.4(5)  |
| N1              | Cu1  | O2 <sup>1</sup>  | 95.73(19)  | O5   | C14  | N5   | 113.0(5)  |
| N1              | Cu1  | N5 <sup>1</sup>  | 102.9(2)   | O5   | C14  | C15  | 124.3(5)  |
| N5 <sup>1</sup> | Cu1  | O2 <sup>1</sup>  | 96.26(18)  | N5   | C14  | C15  | 122.6(5)  |
| N6 <sup>1</sup> | Cu1  | O2 <sup>1</sup>  | 104.5(2)   | C16  | C15  | C14  | 118.9(6)  |
| N6 <sup>1</sup> | Cu1  | N1               | 158.7(2)   | C15  | C16  | C17  | 119.5(6)  |
| N6 <sup>1</sup> | Cu1  | N5 <sup>1</sup>  | 81.9(2)    | C18  | C17  | C16  | 119.2(6)  |
| C5              | O1   | Cu1              | 115.1(4)   | N5   | C18  | C17  | 121.7(6)  |
| C7              | O2   | Cu1 <sup>1</sup> | 123.1(4)   | N5   | C18  | C19  | 115.2(5)  |
| C14             | O5   | C13              | 116.4(4)   | C17  | C18  | C19  | 123.1(5)  |
| C3              | N1   | Cu1              | 114.6(4)   | N6   | C19  | C18  | 115.1(5)  |
| C4              | N1   | Cu1              | 109.1(4)   | N6   | C19  | C20  | 121.4(6)  |
| C4              | N1   | C3               | 112.9(5)   | C20  | C19  | C18  | 123.5(5)  |
| C5              | N2   | C6               | 123.2(5)   | C21  | C20  | C19  | 119.3(6)  |
| C5              | N2   | C8               | 119.6(5)   | C20  | C21  | C22  | 118.7(6)  |
| C8              | N2   | C6               | 117.2(5)   | C23  | C22  | C21  | 120.2(7)  |
| C9              | N3   | C10              | 123.3(6)   | N6   | C23  | C22  | 121.3(6)  |
| C9              | N3   | C12              | 119.6(5)   | O6   | Cl2  | O9   | 111.2(6)  |
| C10             | N3   | C12              | 117.1(5)   | O7   | Cl2  | O6   | 108.1(5)  |
| C14             | N5   | Cu1 <sup>1</sup> | 129.5(4)   | O7   | Cl2  | O8   | 111.0(5)  |
| C14             | N5   | C18              | 118.1(5)   | O7   | Cl2  | O9   | 109.4(4)  |
| C18             | N5   | Cu1 <sup>1</sup> | 112.4(4)   | O8   | Cl2  | O6   | 107.7(4)  |
| C19             | N6   | Cu1 <sup>1</sup> | 115.3(4)   | O8   | Cl2  | O9   | 109.4(5)  |
| C19             | N6   | C23              | 119.1(5)   | O10  | Cl3  | O12  | 110.7(6)  |
| C23             | N6   | Cu1 <sup>1</sup> | 125.5(4)   | O10  | Cl3  | O13  | 107.7(14) |
| C2              | C1   | Cl1              | 111.0(5)   | O11  | Cl3  | O10  | 117.4(6)  |
| C1              | C2   | C3               | 110.6(6)   | O11  | Cl3  | O12  | 111.1(6)  |
| N1              | C3   | C2               | 112.0(6)   | O11  | Cl3  | O13  | 105.2(10) |
| N1              | C4   | C5               | 111.0(5)   | O11A | Cl3  | O10A | 92.1(14)  |
| O1              | C5   | N2               | 121.3(6)   | O12  | Cl3  | O13  | 103.6(13) |
| O1              | C5   | C4               | 118.3(5)   | O12A | Cl3  | O10A | 94.5(17)  |

|    |     |     |          |      |      |      |           |
|----|-----|-----|----------|------|------|------|-----------|
| N2 | C5  | C4  | 120.4(5) | O12A | Cl3  | O11A | 125.9(15) |
| N2 | C6  | C7  | 114.0(5) | O12A | Cl3  | O13A | 118(4)    |
| O2 | C7  | C6  | 113.2(5) | O13A | Cl3  | O10A | 111(4)    |
| N2 | C8  | C9  | 110.7(5) | O13A | Cl3  | O11A | 109(4)    |
| O3 | C9  | N3  | 122.2(6) | O14  | C24  | C25  | 108(3)    |
| O3 | C9  | C8  | 118.6(6) | O14A | C24A | C25A | 109(2)    |
| N3 | C9  | C8  | 119.2(5) | C24  | C25  | C26  | 105.2(19) |
| N3 | C10 | C11 | 113.7(5) | C26A | C25A | C24A | 111(2)    |
| O4 | C11 | N4  | 124.0(6) |      |      |      |           |

$\text{Cu}_2(\text{BEPropyl})_2$ :

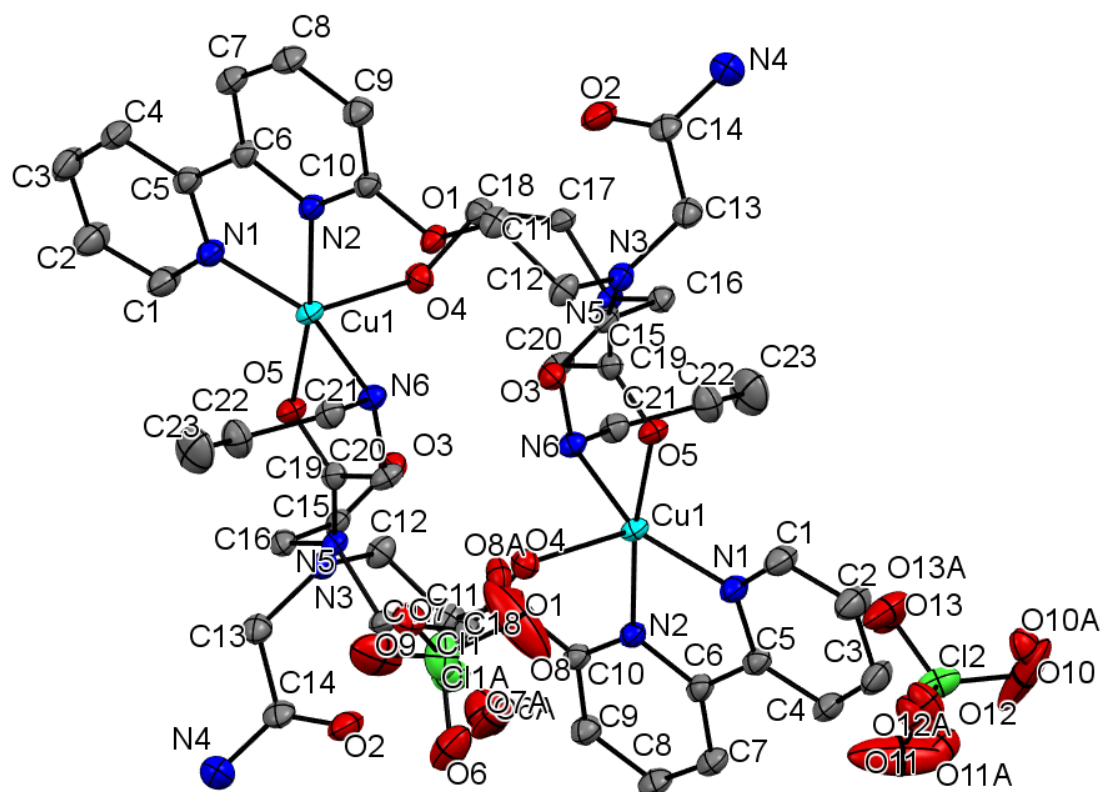



Table S6 Bond Lengths for Cu<sub>2</sub>(BEPropyl)<sub>2</sub>.

| Atom | Atom | Length/Å | Atom | Atom            | Length/Å   |
|------|------|----------|------|-----------------|------------|
| C1   | C2   | 1.385(3) | C19  | N5              | 1.328(3)   |
| C1   | N1   | 1.342(3) | C19  | O5              | 1.259(3)   |
| C2   | C3   | 1.390(4) | C20  | N6              | 1.484(3)   |
| C3   | C4   | 1.383(4) | C21  | C22             | 1.518(3)   |
| C4   | C5   | 1.381(3) | C21  | N6              | 1.491(3)   |
| C5   | C6   | 1.480(3) | C22  | C23             | 1.519(4)   |
| C5   | N1   | 1.351(3) | Cu1  | N1 <sup>1</sup> | 1.9820(19) |
| C6   | C7   | 1.379(3) | Cu1  | N2 <sup>1</sup> | 2.0305(17) |
| C6   | N2   | 1.365(3) | Cu1  | N6              | 2.0008(18) |
| C7   | C8   | 1.388(3) | Cu1  | O4 <sup>1</sup> | 2.2256(15) |
| C8   | C9   | 1.378(3) | Cu1  | O5              | 1.9647(15) |
| C9   | C10  | 1.398(3) | Cl2  | O10             | 1.375(9)   |
| C10  | N2   | 1.340(3) | Cl2  | O12             | 1.436(9)   |
| C10  | O1   | 1.345(3) | Cl2  | O13             | 1.428(10)  |
| C11  | C12  | 1.516(3) | Cl2  | O11             | 1.476(10)  |
| C11  | O1   | 1.447(3) | Cl2  | O10A            | 1.482(6)   |
| C12  | N3   | 1.465(3) | Cl2  | O11A            | 1.406(7)   |
| C13  | C14  | 1.532(3) | Cl2  | O12A            | 1.426(12)  |
| C13  | N3   | 1.457(3) | Cl2  | O13A            | 1.430(10)  |
| C14  | N4   | 1.337(3) | O7   | Cl1             | 1.425(3)   |
| C14  | O2   | 1.219(3) | O7   | Cl1A            | 2.067(7)   |
| C15  | C16  | 1.526(3) | O9   | Cl1             | 1.429(2)   |
| C15  | N3   | 1.346(3) | O9   | Cl1A            | 1.296(4)   |
| C15  | O3   | 1.231(3) | Cl1  | O6              | 1.492(4)   |
| C16  | N5   | 1.463(3) | Cl1  | O8              | 1.346(5)   |
| C17  | C18  | 1.523(3) | Cl1A | O6A             | 1.147(9)   |
| C17  | N5   | 1.477(3) | Cl1A | O7A             | 1.439(11)  |
| C18  | O4   | 1.432(3) | Cl1A | O8A             | 1.751(10)  |
| C19  | C20  | 1.508(3) |      |                 |            |

Table S7. Bond Angles for Cu<sub>2</sub>(BEPropyl)<sub>2</sub>.

| Atom            | Atom | Atom            | Angle/°    |
|-----------------|------|-----------------|------------|
| N1              | C1   | C2              | 121.9(2)   |
| C1              | C2   | C3              | 118.6(2)   |
| C4              | C3   | C2              | 119.4(2)   |
| C5              | C4   | C3              | 119.2(2)   |
| C4              | C5   | C6              | 123.7(2)   |
| N1              | C5   | C4              | 121.3(2)   |
| N1              | C5   | C6              | 114.93(19) |
| C7              | C6   | C5              | 122.7(2)   |
| N2              | C6   | C5              | 115.08(18) |
| N2              | C6   | C7              | 122.2(2)   |
| C6              | C7   | C8              | 119.0(2)   |
| C9              | C8   | C7              | 119.7(2)   |
| C8              | C9   | C10             | 118.3(2)   |
| N2              | C10  | C9              | 122.85(19) |
| N2              | C10  | O1              | 113.68(17) |
| O1              | C10  | C9              | 123.5(2)   |
| O1              | C11  | C12             | 107.93(17) |
| N3              | C12  | C11             | 112.34(18) |
| N3              | C13  | C14             | 113.41(19) |
| N4              | C14  | C13             | 113.6(2)   |
| O2              | C14  | C13             | 122.5(2)   |
| O2              | C14  | N4              | 123.9(2)   |
| N3              | C15  | C16             | 118.38(18) |
| O3              | C15  | C16             | 119.00(18) |
| O3              | C15  | N3              | 122.6(2)   |
| N5              | C16  | C15             | 110.88(17) |
| N5              | C17  | C18             | 113.96(17) |
| O4              | C18  | C17             | 112.82(17) |
| N5              | C19  | C20             | 119.72(18) |
| O5              | C19  | C20             | 118.99(18) |
| O5              | C19  | N5              | 121.3(2)   |
| N6              | C20  | C19             | 110.50(17) |
| N6              | C21  | C22             | 112.65(18) |
| C21             | C22  | C23             | 111.1(2)   |
| N1 <sup>1</sup> | Cu1  | N2 <sup>1</sup> | 81.81(7)   |
| N1 <sup>1</sup> | Cu1  | N6              | 157.36(8)  |
| N1 <sup>1</sup> | Cu1  | O4 <sup>1</sup> | 105.10(7)  |
| N2 <sup>1</sup> | Cu1  | O4 <sup>1</sup> | 97.59(6)   |

| Atom | Atom | Atom             | Angle/°    |
|------|------|------------------|------------|
| C1   | N1   | Cu1 <sup>1</sup> | 125.29(15) |
| C5   | N1   | Cu1 <sup>1</sup> | 115.04(15) |
| C6   | N2   | Cu1 <sup>1</sup> | 112.82(14) |
| C10  | N2   | C6               | 117.97(18) |
| C10  | N2   | Cu1 <sup>1</sup> | 129.21(14) |
| C13  | N3   | C12              | 117.02(18) |
| C15  | N3   | C12              | 119.40(18) |
| C15  | N3   | C13              | 123.45(18) |
| C16  | N5   | C17              | 117.31(17) |
| C19  | N5   | C16              | 119.69(17) |
| C19  | N5   | C17              | 122.95(18) |
| C20  | N6   | C21              | 112.59(16) |
| C20  | N6   | Cu1              | 109.54(13) |
| C21  | N6   | Cu1              | 113.30(13) |
| C10  | O1   | C11              | 117.24(16) |
| C18  | O4   | Cu1 <sup>1</sup> | 124.70(12) |
| C19  | O5   | Cu1              | 114.96(14) |
| O10  | Cl2  | O12              | 108.1(12)  |
| O10  | Cl2  | O13              | 114.1(9)   |
| O10  | Cl2  | O11              | 114.3(7)   |
| O12  | Cl2  | O11              | 104.0(12)  |
| O13  | Cl2  | O12              | 114.1(14)  |
| O13  | Cl2  | O11              | 101.8(11)  |
| O11A | Cl2  | O10A             | 107.0(4)   |
| O11A | Cl2  | O12A             | 112.6(13)  |
| O11A | Cl2  | O13A             | 116.5(9)   |
| O12A | Cl2  | O10A             | 109.1(14)  |
| O12A | Cl2  | O13A             | 107.7(18)  |
| O13A | Cl2  | O10A             | 103.5(10)  |
| O7   | Cl1  | O9               | 108.73(18) |
| O7   | Cl1  | O6               | 102.12(18) |
| O9   | Cl1  | O6               | 105.1(2)   |
| O8   | Cl1  | O7               | 110.3(3)   |
| O8   | Cl1  | O9               | 117.6(3)   |
| O8   | Cl1  | O6               | 111.9(4)   |
| O9   | Cl1A | O7               | 83.9(3)    |
| O9   | Cl1A | O7A              | 99.5(5)    |
| O9   | Cl1A | O8A              | 100.6(4)   |

|    |     |                 |            |     |      |     |          |
|----|-----|-----------------|------------|-----|------|-----|----------|
| N6 | Cu1 | N2 <sup>1</sup> | 101.88(7)  | O6A | Cl1A | O7  | 88.0(6)  |
| N6 | Cu1 | O4 <sup>1</sup> | 96.60(7)   | O6A | Cl1A | O9  | 150.9(7) |
| O5 | Cu1 | N1 <sup>1</sup> | 90.60(7)   | O6A | Cl1A | O7A | 90.2(7)  |
| O5 | Cu1 | N2 <sup>1</sup> | 171.91(7)  | O6A | Cl1A | O8A | 103.3(8) |
| O5 | Cu1 | N6              | 84.06(7)   | O7A | Cl1A | O7  | 175.8(4) |
| O5 | Cu1 | O4 <sup>1</sup> | 87.08(6)   | O7A | Cl1A | O8A | 104.7(5) |
| C1 | N1  | C5              | 119.57(19) | O8A | Cl1A | O7  | 72.1(4)  |
